# Supplementary material for: Economic Evaluation of Quality Improvement Interventions Designed to Improve Glycemic Control in Diabetes: A Systematic Review and Weighted Regression Analysis
Source: Oxford University Press journal article supplement (doi:10.2337/dc17-1495), 2018-04-12
Supplement: dc171495supplementarydata.pdf [file dc171495supplementarydata.pdf]

SUPPLEMENTARY DATA

**conomic Evaluation of Quality Improvement Interventions Designed to Improve Glycemic Control in Diabetes Mellitus: A Systematic Review**

**Supplementary 1. Search Strategy**

DATABASE SEARCHED & TIME PERIOD COVERED:

PubMed – 1/1/2000-4/10/2014

LANGUAGE:

English

SEARCH STRATEGY:

"HbA1c"[tiab] OR "glycemic"[tiab] OR glycosylated hemoglobin\* OR glycosylated haemoglobin\* OR "glucose control"[tiab] OR "euglycemia"[tiab] OR "hemoglobin A1c" OR A1C OR glyated hemoglobin\* OR glyated haemoglobin\* OR glycohemoglobin OR glycohaemoglobin OR "haemoglobin A1c" OR "Hb1c" OR "normoglycemia" OR "Hemoglobin A, Glycosylated"[MeSH]

AND

Economics[mh] OR "Costs and Cost Analysis"[mh] OR "Value of Life"[mh] OR Economics, Dental[mh] OR Economics, Hospital[mh] OR Economics, Medical[mh] OR Economics, Nursing[mh] OR Economics, Pharmaceutical[mh] OR economic\*[tiab] OR cost[tiab] OR costs[tiab] OR costly[tiab] OR costing[tiab] OR price[tiab] OR prices[tiab] OR pricing[tiab] OR pharmaco-economic\*[tiab] OR (expenditure\* NOT energy) OR value[ti] OR budget\*[tiab] OR cost-benefit analysis[mh] OR cost savings[mh] OR investments[Majr] OR budgets[Majr] OR drug utilization/economics[Majr] OR costs and cost analysis[mh] OR models, economic[mh] OR iatrogenic disease/economics[Majr] OR health care costs[mh] OR health expenditures[Majr] OR capital expenditures OR "medical errors/economics" OR "Quality Improvement/economics" OR "Quality Indicators, Health Care/economics" OR "Quality Assurance, Health Care/economics" OR "quality of health care/economics" OR "total quality management/economics" OR net benefit[tiab] OR net-benefit[tiab] OR return on investment[tiab] OR Save money[tiab] OR Savings[tiab] OR profit[tiab] OR financial[tiab] OR investment\*[tiab] OR invest[tiab] OR investing[tiab] OR fiscal[tiab] OR monetary[tiab] OR money[tiab] OR dollar\*[tiab] OR "willingness to pay"[tiab] OR willingness-to-pay[tiab] OR "willing to pay"[tiab] OR business case[tiab] OR charges[tiab] OR charge[tiab] OR pay[tiab] OR pays[tiab] OR paying[tiab] OR payment[tiab] OR fee[tiab] OR fees[tiab] OR "market force"[tiab] OR "market forces" OR accounting[tiab] OR spending[tiab] OR health resource allocation OR unit-cost OR unit-costs OR valuation OR fees and charges[mh] OR saving[tiab] OR economics[sh] OR cost-effective[tiab] OR budget impact analys\* OR roi[tiab] OR cost-minimiz\* OR cost-consequence OR cost-utility OR net-cost OR net-costs

NOT

predictive value OR prognostic value

=====  
DATABASE SEARCHED & TIME PERIOD COVERED:

EconLit – 1/1/2000-3/6/2015

LANGUAGE:

English

SEARCH STRATEGY:

HbA1c OR glycemic OR glycosylated hemoglobin\* OR glycosylated haemoglobin\* OR glucose control OR euglycemia OR hemoglobin A1c OR A1C OR glyated hemoglobin\* OR glyated haemoglobin\* OR glycohemoglobin OR glycohaemoglobin OR haemoglobin A1c OR Hb1c OR normoglycemia

AND

diabetes OR diabetic

---

VALUE OF QI – GLYCEMIC CONTROL (DIABETES) – 2016 UPDATE

SEARCH METHODOLOGY

DATABASE SEARCHED & TIME PERIOD COVERED:

SUPPLEMENTARY DATA

PubMed – 1/1/2014-8/1/2016

LANGUAGE:

English

SEARCH STRATEGY:

"HbA1c"[tiab] OR "glycemic"[tiab] OR glycosylated hemoglobin\* OR glycosylated haemoglobin\* OR "glucose control"[tiab] OR "euglycemia"[tiab] OR "hemoglobin A1c" OR A1C OR glycated hemoglobin\* OR glycated haemoglobin\* OR glycohemoglobin OR glycohaemoglobin OR "haemoglobin A1c" OR "Hb1c" OR "normoglycemia" OR "Hemoglobin A, Glycosylated"[MeSH] OR (glycemic index OR glycemic load[MH])

AND

Economics[mh] OR "Costs and Cost Analysis"[mh] OR "Value of Life"[mh] OR Economics, Dental[mh] OR Economics, Hospital[mh] OR Economics, Medical[mh] OR Economics, Nursing[mh] OR Economics, Pharmaceutical[mh] OR economic\*[tiab] OR cost[tiab] OR costs[tiab] OR costly[tiab] OR costing[tiab] OR price[tiab] OR prices[tiab] OR pricing[tiab] OR pharmaco-economic\*[tiab] OR (expenditure\* NOT energy) OR value[ti] OR budget\*[tiab] OR cost-benefit analysis[mh] OR cost savings[mh] OR investments[Majr] OR budgets[Majr] OR drug utilization/economics[Majr] OR costs and cost analysis[mh] OR models, economic[mh] OR iatrogenic disease/economics[Majr] OR health care costs[mh] OR health expenditures[Majr] OR capital expenditures OR "medical errors/economics" OR "Quality Improvement/economics" OR "Quality Indicators, Health Care/economics" OR "Quality Assurance, Health Care/economics" OR "quality of health care/economics" OR "total quality management/economics" OR net benefit[tiab] OR net-benefit[tiab] OR return on investment[tiab] OR Save money[tiab] OR Savings[tiab] OR profit[tiab] OR financial[tiab] OR investment\*[tiab] OR invest[tiab] OR investing[tiab] OR fiscal[tiab] OR monetary[tiab] OR money[tiab] OR dollar\*[tiab] OR "willingness to pay"[tiab] OR willingness-to-pay[tiab] OR "willing to pay"[tiab] OR business case[tiab] OR charges[tiab] OR charge[tiab] OR pay[tiab] OR pays[tiab] OR paying[tiab] OR payment[tiab] OR fee[tiab] OR fees[tiab] OR "market force"[tiab] OR "market forces" OR accounting[tiab] OR spending[tiab] OR health resource allocation OR unit-cost OR unit-costs OR valuation OR fees and charges[mh] OR saving[tiab] OR economics[sh] OR cost-effective[tiab] OR budget impact analys\* OR roi[tiab] OR cost-minimiz\* OR cost-consequence OR cost-utility OR net-cost OR net-costs

NOT

predictive value\* OR prognostic value\*

=====

DATABASE SEARCHED & TIME PERIOD COVERED:

EconLit – 1/1/2014-8/1/2016

LANGUAGE:

English

SEARCH STRATEGY:

HbA1c OR glycemic OR glycosylated hemoglobin\* OR glycosylated haemoglobin\* OR glucose control OR euglycemia OR hemoglobin A1c OR A1C OR glycated hemoglobin\* OR glycated haemoglobin\* OR glycohemoglobin OR glycohaemoglobin OR haemoglobin A1c OR Hb1c OR normoglycemia

AND

diabetes OR diabetic

=====

DATABASE SEARCHED & TIME PERIOD COVERED:

Grey Literature Report – 1/1/2014-8/1/2016

LANGUAGE:

English

SEARCH STRATEGY:

hemoglobin OR glycemic OR A1C OR glucose OR diabetes

## SUPPLEMENTARY DATA

### Supplementary 2. Classification of QI Strategies for Improving Glycemic Control

We used the following definitions for system-oriented, practitioner-oriented and patient-oriented strategies.

#### System-oriented Strategies

**Disease Management:** Any system for coordinating diagnosis, treatment, or ongoing patient management (e.g., arrangement for referrals, follow-up of test results) by a person or multidisciplinary team in collaboration with or supplementary to the primary care clinician. Often a nurse will be collecting data and act as a liaison between patient and others. Focuses on a specific disease.

**Case Management:** Any system for coordinating diagnosis, treatment, or ongoing patient management (eg, arrangement for referrals, follow-up of test results) by a person or multidisciplinary team in collaboration with or supplementary to the primary care clinician. The high cost patients and the very frail or geriatric patients go here. Focuses on the patient, not the disease. QII for people with a particular disease, such as diabetes goes into disease management. If the study calls it case management, so do we. Disease and case management were collapsed during analysis due to their inherent similarities and the fact that only one study addressed case management.

**Team Changes:** Changes to the structure or organization of the health care team, defined as present if any of the following applied. Of note, the professionals need to be part of the clinical team; individuals who act on behalf of payers or other external entities would not be included.

- Adding a team member or “shared care,” e.g., routine visits with personnel other than the primary physician (including physician or nurse specialists in diabetic care, pharmacists, nutritionists, podiatrists).
- Use of multidisciplinary teams, i.e., active participation of professionals from more than one discipline (e.g., medicine, nursing, pharmacy, nutrition) in the primary, ongoing management of patients.
- Expansion or revision of professional roles (e.g., nurse or pharmacist plays more active role in patient monitoring or adjusting medication regimens).

**Electronic Patient Registry:** General electronic medical record system or electronic tracking system for patients with diabetes. Valuable QI tool, but only code it if it is new.

**Facilitated Relay of Clinical Information:** Clinical information collected from patients and transmitted to clinicians by means other than the existing medical record. Conventional means of correspondence between clinicians were excluded. For example, if the results of routine visits with a pharmacist were sent in a letter to the primary care physician, the use of routine visits with a pharmacist would count as a “team” change, but the intervention would not also be counted as “facilitated relay.” Usually electronic or Web-based tools through which patients provide self-care data, but also structured diaries for patients to record self-monitored health data, which are brought in person to office visits to review with the primary physician. Includes point-of-care testing.

**Continuous Quality Improvement:** Interventions explicitly identified as using the techniques of continuous quality improvement, total quality management, or plan-do-study-act, or any iterative process for assessing quality problems, developing solutions to those problems, testing their impacts, and then reassessing the need for further action.

**Enhancing Efficiency:** These interventions focus on reducing the cost of care, generally while keeping clinical quality/outcomes constant. This includes interventions designed to eliminate the use of discretionary or unnecessary services, or to reduce the costs involved in high priced or overpriced services. This includes eliminating services (laboratory tests, procedures, etc.), increasing the use of less costly substitutes (e.g., substituting generic for brand drugs, substituting group for individual visits). Generally, these analyses will involve equivalence trials (test of non-inferiority) or an assumption that outcomes will not worsen.

**Standardizing Care:** These interventions include checklists, protocols, care pathways and other ways of standardizing care such that the bundle of services received by patients in similar situations is more consistent. E.g., checklists and bundles to reduce ventilator-associated pneumonia, standardize the steps involved in a surgical procedure, etc.

#### Practitioner-oriented Strategies

## SUPPLEMENTARY DATA

**Audit and Feedback:** Summary of clinical performance of health care delivered by an individual clinician or clinic over a specified period, which is then transmitted back to the clinician (e.g., the percentage of a clinician's patients who have achieved a target glycosylated hemoglobin [HbA1c] level, or patients who were readmitted within 30 days). Can include number of patients with missing data or dropouts.

**Provider Education:** Interventions designed to promote increased understanding of principles guiding clinical care or awareness of specific clinical recommendations for a target condition or patient population. Could be conferences or workshops, distribution of educational materials, and educational outreach visits. (Ivers call this clinician education) We exclude training for an intervention: e.g. how to use the website, educate patients etc. Judgment is required in how much provider education counts; it needs to be more than the minimum required to implement a different category of QI intervention (e.g., more than training providers how to use decision support, for example).

**Provider Decision Support:** Paper-based or electronic system intended to prompt a health professional to recall patient-specific information (e.g., most recent HbA1c value) or to perform a specific task (e.g., perform a foot examination). Usually includes a recommendation. (Ivers calls this QII clinical reminders)

**Financial Incentives for Providers:** These interventions offer providers financial incentives for improving quality or reducing costs (e.g., pay for performance) or structure reimbursement or payment systems to create implicit incentives for improving quality or reducing costs (value-based insurance design, prospective, capitated, or bundled payment). Improving quality or reducing costs may be a primary or secondary objective of the implementing the incentives, but the economic evaluation must consider effects on clinical outcomes and costs.

### Patient-oriented Strategies

**Tailoring Care for Unique Patient Subgroups:** These interventions focus on specific subgroups that share certain non-clinical characteristics, such as culture, language, income, age, gender, social situation (e.g., homeless, immigrant, incarcerated), or sexual identity. They ALSO tailor clinical care (not just patient education or self-management) based on the needs of the subgroup. For example, patients in certain immigrant populations share culture and language, but they may also share risk factors for certain diseases, such as TB, hepatitis C, etc. Interventions that group patients with similar clinical characteristics (e.g., diabetes, heart failure, etc.) will generally go into other categories depending on what the intervention entails, such as provider education, patient self-management, etc.

**Patient Education:** Interventions designed to promote increased understanding of a target condition or to teach specific prevention or treatment strategies, or specific in-person patient education (eg, individual or group sessions with diabetes nurse educator; distribution of printed or electronic educational materials). Judgment needed to say how much patient education counts (e.g. just giving them a pamphlet does not), needs to be more than the minimum required to implement a different category of QI intervention (e.g., more than training how to perform self-management).

**Promotion of Patient Self-Management:** Provision of equipment (eg, home glucometers) or access to resources (eg, system for electronically transmitting home glucose measurements and receiving insulin dose changes based on those data) to promote self-management. This includes increasing availability of provider advice, such as through nursing hot lines, email exchanges with providers, interpreter services, and other interventions designed to improve patient adherence to the care plan, including medications, diet, exercise, and other self-care modalities.

**Patient Reminder Systems:** Any effort (eg, postcards or telephone calls or Patient Portals like MyUCLA) that have useful information re appointments, results etc. to remind patients about upcoming appointments or important aspects of self-care.

**Financial Incentives for Patients:** These interventions offer patients financial incentives for improving self-care, medication adherence, or other behaviors that may improve outcomes or reduce costs; or structure reimbursement or payment systems to create implicit incentives for improving quality or reducing costs (e.g., value-based insurance design). Improving quality or reducing costs may be a primary or secondary objective of the implementing the incentives, but the economic evaluation must consider effects on clinical outcomes and costs.

Sources:

## SUPPLEMENTARY DATA

Andrea C Tricco, Noah M Ivers, Jeremy M Grimshaw, David Moher, Lucy Turner, James Galipeau, Ilana Halperin, Brigitte Vachon, Tim Ramsay, Braden Manns, Marcello Tonelli, Kaveh Shojania. Effectiveness of quality improvement strategies on the management of diabetes: a systematic review and meta-analysis. *Lancet* 2012; 379: 2252–61.

Ivers N, Tricco AC, Trikalinos TA, Dahabreh IJ, Danko KJ, Moher D, Straus SE, Lavis JN, Yu CH, Shojania K, Manns B, Tonelli M, Ramsay T, Edwards A, Sargious P, Paprica A, Hillmer M, Grimshaw JM. Seeing the forests and the trees--innovative approaches to exploring heterogeneity in systematic reviews of complex interventions to enhance health system decision-making: a protocol. *Syst Rev*. 2014 Aug 12;3:88. doi: 10.1186/2046-4053-3-88.

Shojania KG, Ranji SR, McDonald KM, Grimshaw JM, Sundaram V, Rushakoff RJ, Owens DK. Effects of quality improvement strategies for type 2 diabetes on glycemic control: a meta-regression analysis. *JAMA*. 2006 Jul 26;296(4):427-40.

SUPPLEMENTARY DATA

Supplementary 3. PRISMA Flow Diagram

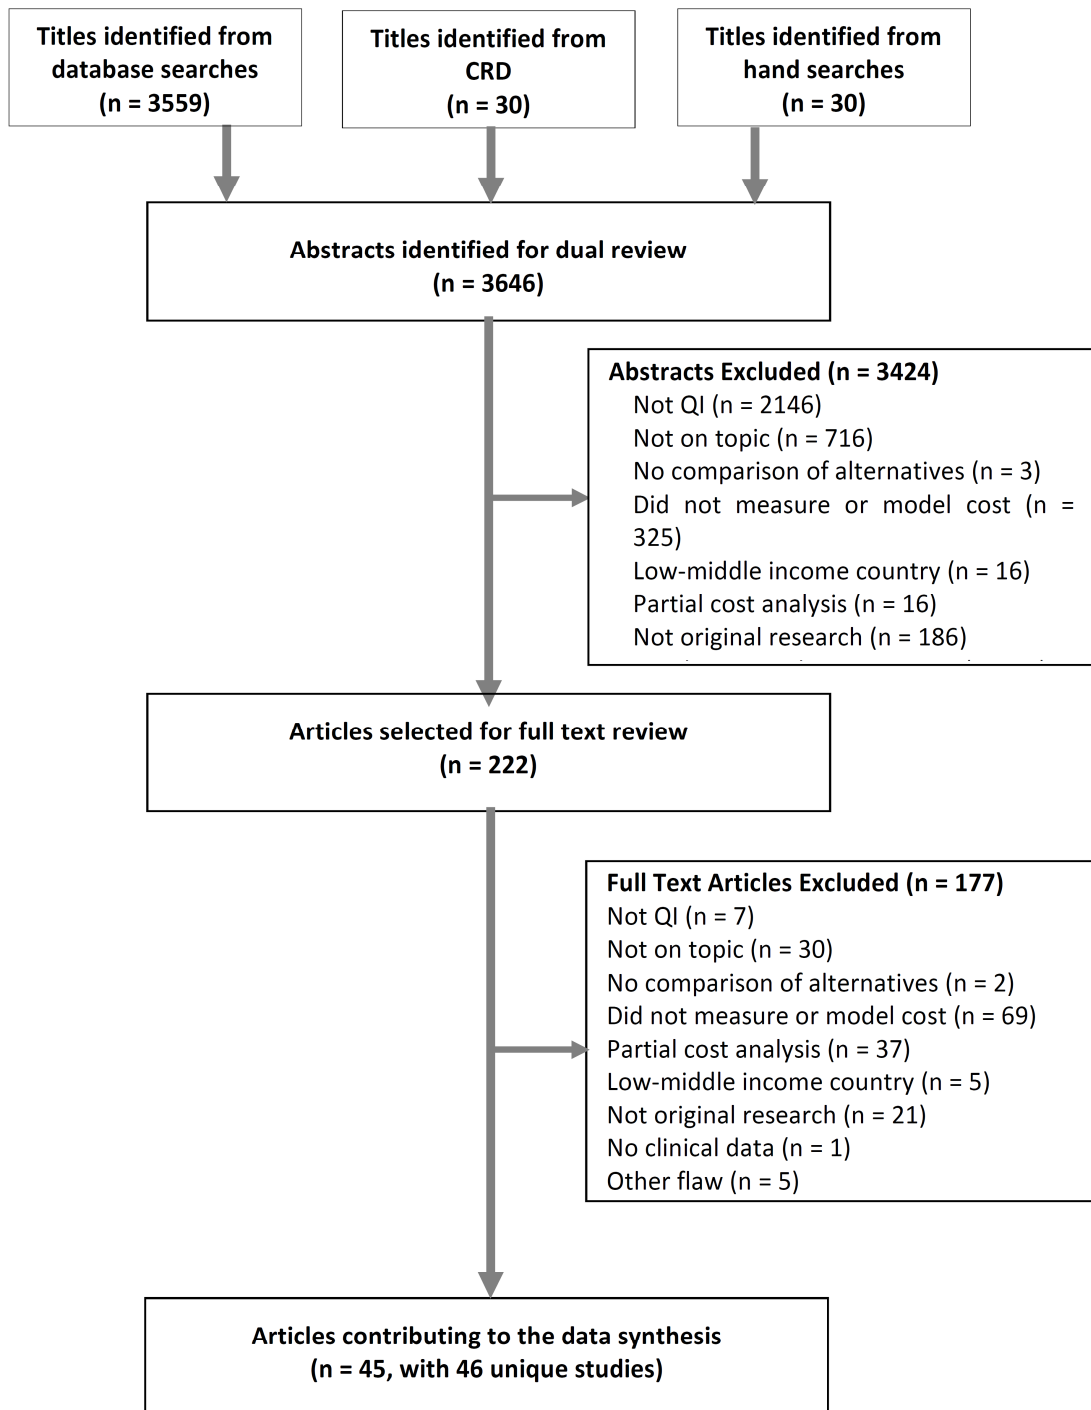

SUPPLEMENTARY DATA

Supplementary 4. Data Extracted for Each Eligible Study

Table 1. Quality Improvement Strategies Used in Each Eligible Study

| Author and Year (Citations)      | System-oriented Strategies |                    |              |                             |                   |               |                      |                    | Practitioner-oriented Strategies |                    |                           |                          | Patient-oriented Strategies |                   |                         |                   |                         |
|----------------------------------|----------------------------|--------------------|--------------|-----------------------------|-------------------|---------------|----------------------|--------------------|----------------------------------|--------------------|---------------------------|--------------------------|-----------------------------|-------------------|-------------------------|-------------------|-------------------------|
|                                  | Case Management            | Disease Management | Team Changes | Electronic Patient Registry | Facilitated Relay | Continuous QI | Enhancing Efficiency | Standardizing Care | Audit and Feedback               | Provider Education | Provider Decision Support | Incentives for Providers | Tailoring Care              | Patient Education | Patient Self-Management | Patient Reminders | Incentives for Patients |
| <b>Short Term</b>                |                            |                    |              |                             |                   |               |                      |                    |                                  |                    |                           |                          |                             |                   |                         |                   |                         |
| Handley 2008 <sup>1,2</sup>      |                            | X                  | X            |                             |                   |               |                      |                    |                                  |                    |                           |                          | X                           | X                 | X                       | X                 |                         |
| Wilson 2014 <sup>3,4</sup>       |                            | X                  | X            |                             |                   |               |                      | X                  |                                  |                    |                           |                          |                             | X                 | X                       |                   |                         |
| Sperl-Hillen 2010 <sup>5</sup>   |                            |                    |              |                             |                   |               |                      | X                  | X                                | X                  |                           |                          |                             |                   |                         |                   |                         |
| Eccles 2007 <sup>6,7</sup>       |                            |                    |              |                             |                   |               |                      |                    | X                                |                    | X                         |                          |                             | X                 |                         | X                 |                         |
| Allen 2013 <sup>8,9</sup>        |                            | X                  | X            |                             |                   |               |                      | X                  |                                  |                    |                           |                          |                             | X                 | X                       | X                 |                         |
| Katon 2012 <sup>10</sup>         |                            | X                  | X            |                             |                   |               |                      |                    |                                  | X                  |                           |                          |                             | X                 | X                       |                   |                         |
| Houweling 2009 <sup>11</sup>     |                            | X                  | X            |                             |                   |               |                      | X                  |                                  |                    |                           |                          |                             | X                 |                         |                   |                         |
| Noel 2004 <sup>12</sup>          | X                          |                    |              |                             | X                 |               |                      |                    |                                  |                    |                           |                          |                             | X                 |                         |                   |                         |
| Kogut 2012 <sup>13</sup>         |                            | X                  |              |                             |                   |               |                      | X                  |                                  |                    |                           |                          |                             | X                 | X                       |                   | X                       |
| Sidorov 2002 <sup>14,15</sup>    |                            | X                  | X            | X                           |                   |               |                      |                    |                                  | X                  |                           |                          |                             | X                 | X                       |                   | X                       |
| Mousques 2010 <sup>16</sup>      |                            | X                  | X            | X                           |                   |               |                      |                    |                                  |                    | X                         |                          |                             | X                 |                         |                   |                         |
| Spence 2014 <sup>17</sup>        |                            | X                  |              |                             |                   |               |                      |                    |                                  |                    |                           |                          |                             | X                 | X                       |                   |                         |
| Nundy 2014 <sup>18</sup>         |                            | X                  |              |                             | X                 |               |                      |                    |                                  |                    |                           |                          |                             | X                 | X                       | X                 |                         |
| Gilmer 2005 <sup>19</sup>        |                            | X                  | X            |                             |                   |               |                      |                    |                                  |                    |                           |                          | X                           | X                 | X                       |                   |                         |
| Salzsieder 2011 <sup>20</sup>    |                            | X                  |              |                             |                   |               |                      |                    |                                  |                    | X                         |                          |                             |                   |                         |                   |                         |
| Franklin 2013 <sup>21,22</sup>   |                            | X                  | X            |                             |                   |               |                      |                    |                                  |                    |                           |                          |                             | X                 |                         |                   |                         |
| Steuten 2007 <sup>23,24</sup>    |                            | X                  | X            |                             |                   |               |                      | X                  | X                                |                    |                           |                          |                             | X                 | X                       |                   |                         |
| Keers 2005 <sup>25</sup>         |                            |                    | X            |                             |                   |               |                      | X                  |                                  |                    |                           |                          |                             | X                 | X                       |                   |                         |
| Haji 2013 <sup>26</sup>          |                            |                    | X            |                             |                   |               |                      |                    |                                  |                    |                           |                          |                             | X                 | X                       |                   |                         |
| Balamurugan 2006 <sup>27</sup>   |                            |                    |              |                             |                   | X             |                      |                    |                                  |                    |                           |                          | X                           | X                 | X                       | X                 | X                       |
| Micklethwaite 2012 <sup>28</sup> |                            | X                  | X            |                             |                   |               |                      |                    |                                  |                    |                           |                          |                             | X                 | X                       | X                 |                         |
| Garrett 2005 <sup>29</sup>       |                            | X                  | X            |                             |                   |               |                      |                    |                                  |                    |                           |                          |                             | X                 | X                       |                   | X                       |
| Snyder 2003 <sup>30</sup>        |                            | X                  |              | X                           |                   |               |                      |                    |                                  |                    | X                         |                          |                             | X                 | X                       | X                 |                         |
| <b>Intermediate Term</b>         |                            |                    |              |                             |                   |               |                      |                    |                                  |                    |                           |                          |                             |                   |                         |                   |                         |
| Palmas 2010 <sup>31-33</sup>     |                            | X                  | X            | X                           | X                 |               |                      | X                  |                                  |                    |                           |                          | X                           | X                 |                         |                   |                         |
| Gordon 2014 <sup>34-36</sup>     |                            | X                  | X            | X                           |                   |               |                      |                    |                                  |                    |                           |                          |                             | X                 | X                       | X                 |                         |
| Yu 2013 <sup>37,38</sup>         |                            | X                  | X            |                             |                   |               |                      |                    |                                  |                    |                           |                          |                             |                   | X                       |                   |                         |
| Beaulieu 2006 <sup>39</sup>      |                            | X                  |              |                             |                   |               |                      |                    | X                                |                    | X                         |                          |                             | X                 | X                       |                   |                         |
| <b>Long Term</b>                 |                            |                    |              |                             |                   |               |                      |                    |                                  |                    |                           |                          |                             |                   |                         |                   |                         |
| Gillett 2010 <sup>40,41</sup>    |                            |                    |              |                             |                   |               |                      | X                  |                                  |                    |                           |                          |                             | X                 | X                       |                   |                         |
| Gillespie 2012 <sup>42-44</sup>  |                            |                    |              |                             |                   |               |                      |                    |                                  |                    | X                         |                          |                             |                   | X                       |                   |                         |
| O'Reilly 2012 <sup>45,46</sup>   |                            |                    |              | X                           | X                 |               |                      |                    |                                  |                    | X                         |                          |                             |                   |                         | X                 |                         |

## SUPPLEMENTARY DATA

|                                                         |  |   |   |   |   |   |  |   |   |   |   |   |   |   |   |   |
|---------------------------------------------------------|--|---|---|---|---|---|--|---|---|---|---|---|---|---|---|---|
| Gilmer 2012 <sup>47,48</sup>                            |  |   |   |   |   |   |  |   | X |   | X | X |   |   |   |   |
| Mason 2006 <sup>49,50</sup>                             |  | X |   |   |   |   |  |   |   |   |   |   |   | X | X | X |
| Dijkstra 2006, Provider <sup>51,52</sup>                |  |   |   |   |   |   |  |   | X | X |   |   |   |   |   |   |
| Dijkstra 2006, Provider and patient <sup>51,10452</sup> |  |   |   |   | X |   |  |   | X | X |   |   |   | X |   |   |
| Slingerland 2013 <sup>53</sup>                          |  | X | X |   | X |   |  |   | X |   |   |   |   | X |   |   |
| Prezio 2014 <sup>54,55</sup>                            |  |   |   |   | X |   |  |   |   |   |   |   | X | X | X |   |
| Schouten 2010 <sup>56</sup>                             |  |   | X |   |   | X |  |   |   |   |   |   |   | X | X |   |
| Gilmer 2007 <sup>19,57</sup>                            |  | X | X |   |   |   |  | X |   |   |   |   | X | X | X | X |
| Kuo 2011 <sup>58</sup>                                  |  | X | X |   |   |   |  |   |   |   | X |   |   |   | X |   |
| McRae 2008 <sup>59</sup>                                |  | X |   |   | X |   |  | X | X |   | X |   |   |   |   |   |
| Giorda 2013 <sup>60,61</sup>                            |  | X |   |   |   | X |  | X | X |   |   |   |   |   |   |   |
| Huang 2007 <sup>62-64</sup>                             |  |   |   | X | X | X |  |   |   |   | X |   | X |   | X |   |
| Brownson 2009 <sup>65</sup>                             |  | X |   |   |   |   |  |   |   | X |   |   | X | X | X |   |
| O'Reilly 2007 <sup>66,67</sup>                          |  | X | X | X |   |   |  |   |   | X |   |   |   | X |   |   |
| Gozzoli 2002* <sup>68</sup>                             |  |   |   |   |   |   |  | X |   |   | X |   |   | X |   |   |
| Brown 2012 <sup>69</sup>                                |  | X |   |   |   |   |  |   |   |   |   |   | X | X | X |   |

\*Study included simulations for four scenarios; only the multifactorial one met the study definition of a QI intervention



## SUPPLEMENTARY DATA

**Table 2. Information Related to the Clinical Evaluation for Each Eligible Study\***

| Author and Year (Citations)    | Intervention (Duration)                                                                                                                      | Location and Sites                                                     | Population                                 | Study Design, Comparator | Intervention Group, N          | Control Group, N                    | Baseline HbA1c in Intervention Group | Change in HbA1c † (Timing of Follow-up Test) | Change in HRQoL per Patient (Time Horizon) |
|--------------------------------|----------------------------------------------------------------------------------------------------------------------------------------------|------------------------------------------------------------------------|--------------------------------------------|--------------------------|--------------------------------|-------------------------------------|--------------------------------------|----------------------------------------------|--------------------------------------------|
| <b>Short Term</b>              |                                                                                                                                              |                                                                        |                                            |                          |                                |                                     |                                      |                                              |                                            |
| Handley 2008 <sup>1,2</sup>    | Interactive phone technology to provide surveillance, education, and counseling (9 mos)                                                      | United States, urban, 4 safety net clinics                             | T2DM, in diabetes registry                 | RCT, SQ                  | 112                            | 114                                 | 9.3%                                 | NR                                           | 0.012 QALY (1 yr)                          |
| Wilson 2014 <sup>3,4</sup>     | Intermediate care clinics for DM in which general practitioners work with community-based specialist teams (1.5 yr)                          | United Kingdom, urban, 3 primary care trusts with 49 general practices | T2DM                                       | Cluster RCT, SQ          | 591                            | 636                                 | 7.18%                                | -0.07% (1.5 yr)                              | n/a                                        |
| Sperl-Hillen 2010 <sup>5</sup> | Physician education using cases to teach mastery of 25 essential practices (1 yr)                                                            | United States, 11 primary care clinics                                 | T2DM                                       | Cluster RCT, SQ          | 1,847 at 6 clinics             | 1,570 (5 clinics)                   | 7.4%                                 | -0.19% (1 yr)                                | n/a                                        |
| Eccles 2007 <sup>6,7</sup>     | Individualized patient management prompts added to computerized DM registry (1 yr)                                                           | United Kingdom, 58 general practices                                   | T2DM, age $\geq 35$                        | Cluster RCT, SQ          | 713 with 30 physicians         | 720 with 28 physicians              | 7.75%                                | -0.22% (1 yr)                                | n/a                                        |
| Allen 2013 <sup>8,9</sup>      | Comprehensive CVD risk reduction program administered by nurse practitioner-community health worker teams instead of physician visits (1 yr) | United States, urban, 2 federally qualified community health centers   | T2DM, CVD, HTN, or hyperlipidemia          | RCT, SQ                  | 261                            | 264                                 | 8.9%                                 | -0.5% (1 yr)                                 | n/a                                        |
| Katon 2012 <sup>10</sup>       | Physician-supervised nurses collaborated with physicians to provide treatment of multiple disease risk factors (1 yr)                        | United States, 14 primary care clinics in integrated system            | Depression and poorly controlled DM or CHD | RCT, SQ                  | 106                            | 108                                 | 8.14%                                | -0.56% (1 yr), -0.14% (2 yrs)                | 0.335 QALY (2 yrs)                         |
| Houweling 2009 <sup>11</sup>   | Diabetes specialist/nurse treated blood glucose, blood pressure, and hyperlipidemia per protocol (1 yr)                                      | Netherlands, urban/suburban, 2 outpatient clinics                      | T2DM, referred to program                  | RCT, SQ                  | 46                             | 38                                  | 8.9%                                 | -0.6% (1 yr)                                 | n/a                                        |
| Noel 2004 <sup>12</sup>        | Home telehealth systems integrated in an electronic medical record system (0.5 yr)                                                           | United States, urban, 1 Veterans Affairs health system                 | DM, COPD, or HF                            | RCT, SQ                  | 23 with DM                     | 28 with DM                          | 8.3%                                 | -1.8% (0.5 yr)                               | n/a                                        |
| Kogut 2012 <sup>13</sup>       | Disease management and medication copayment reduction (1 yr)                                                                                 | United States, 5 employers covered by one payer                        | DM                                         | CBA, SQ                  | 649 at participating employers | 9049 declined or at other employers | NR                                   | NR                                           | n/a                                        |
| Sidorov 2002 <sup>14,15</sup>  | Disease management with patient and provider education, promotion of clinical guidelines and early specialist referral (1 yr)                | United States, not-for-profit HMO covering 41 counties                 | T2DM                                       | CBA, SQ                  | 3,118 opted in                 | 3,681 did not opt in                | NR                                   | NR                                           | n/a                                        |

## SUPPLEMENTARY DATA

|                                  |                                                                                                                                                                      |                                                               |                                                |                 |                                     |                                    |                   |                          |     |
|----------------------------------|----------------------------------------------------------------------------------------------------------------------------------------------------------------------|---------------------------------------------------------------|------------------------------------------------|-----------------|-------------------------------------|------------------------------------|-------------------|--------------------------|-----|
| Mousques 2010 <sup>16</sup>      | Electronic patient registry and clinical reminder system; patient education and counseling (11 mos)                                                                  | France, 18 general practices                                  | T2DM                                           | Matched CBA, SQ | 588 from participating practices    | 202 from other practices           | 7.16%             | -0.1% (1 yr)             | n/a |
| Spence 2014 <sup>3</sup>         | When patients presented to outpatient pharmacy for any reason, pharmacists performed spontaneous consults to help patients use DM medication more effectively (1 yr) | United States, California, integrated healthcare system       | T2DM, low medication adherence, and HbA1C > 8% | CBA, SQ         | 359                                 | 428                                | 9.79%             | -0.50% (1 yr)            | n/a |
| Nundy 2014 <sup>18</sup>         | Mobile health, patient education (0.5 yr)                                                                                                                            | United States, urban, employee health plan at academic center | DM type 1 or 2                                 | CBA, SQ         | 74 participated                     | 274 declined                       | 7.9%              | -0.7% (0.5 yr)           | n/a |
| Gilmer 2005 <sup>19</sup>        | Disease management plus culturally oriented peer-led self-empowerment training (1 yr)                                                                                | United States, urban, 17 County health centers                | DM, indigent                                   | CBA, SQ         | 188                                 | 160 historical controls            | 8.5%              | -0.8% (1 yr)             | n/a |
| Salzsieder 2011 <sup>20</sup>    | Telemedicine with patient-focused personalized decision support (1 yr)                                                                                               | Germany, 1 health insurance payer                             | T1DM or T2DM, CVD                              | CBA, SQ         | 214 with participating MDs          | 75 with other MDs                  | 7.1%              | -0.9% (1 yr)             | n/a |
| Franklin 2013 <sup>21,22</sup>   | Collaborative care model with pharmacists and physicians (1 yr)                                                                                                      | United States, 7 primary care practices at academic center    | T2DM, CVD risk factors                         | UCBA, SQ        | 206                                 | n/a                                | 11% had HbA1c <7% | 36% had HbA1c <7% (1 yr) | n/a |
| Steuten 2007 <sup>23,24</sup>    | Multidisciplinary disease management program with central coordination, provider feedback, patient education (2 yrs)                                                 | Netherlands, urban, 63 academic general practices             | T1DM or T2DM                                   | UCBA, SQ        | 473                                 | n/a                                | 7.5%              | -0.2% (2 yrs)            | n/a |
| Keers 2005 <sup>25</sup>         | 12-d multidisciplinary intensive education program (1 yr)                                                                                                            | Netherlands, small city, 1 University hospital                | T1DM or T2DM, self-management difficulties     | UCBA, SQ        | 56                                  | n/a                                | 8.5%              | -0.4% (1 yr)             | n/a |
| Haji 2013 <sup>26</sup>          | Practices with high vs. low involvement of nurses in care for DM (3 yrs)                                                                                             | Australia, Urban, 10 general practices                        | T2DM, ≥3 visits in 2 yrs                       | UCBA, SQ        | 231 at 6 high-involvement practices | 108 at 4 low-involvement practices | 7.02%             | -0.41% (3 yrs)           | n/a |
| Balamugan 2006 <sup>27</sup>     | Self-management education with needs assessment followed by group education (1 yr)                                                                                   | United States, Arkansas Medicaid recipients                   | DM                                             | UCBA, SQ        | 212                                 | n/a                                | 8.00%             | -0.45% (1 yr)            | n/a |
| Micklethwaite 2012 <sup>28</sup> | Diabetes screening, self-management education, skills training, and case management (3 yr)                                                                           | United States, 1 federally qualified health center            | T2DM, recent hospital or ED use                | UCBA, SQ        | 81                                  | n/a                                | 8.31%             | -0.77% (0.5-3 yrs)       | n/a |
| Garrett 2005 <sup>29</sup>       | Pharmacist consultations, goal setting, monitoring, and collaborative management; referrals to DM educators (1 yr)                                                   | United States, 80 community pharmacy providers in 4 states    | DM covered by self-insured employers           | UCBA, SQ        | 256                                 | n/a                                | 7.9%              | -0.8% (1 yr)             | n/a |
| Snyder 2003 <sup>30</sup>        | Disease management program with outreach telephone calls to pts (3 yrs)                                                                                              | United States, Nevada, benefits administrator for teachers    | DM                                             | UCBA, SQ        | 166                                 | n/a                                | 8.89%             | -1.01% (3 yrs)           | n/a |

## SUPPLEMENTARY DATA

| Intermediate Term                  |                                                                                                                           |                                                                    |                                                         |                                                         |                      |                      |                  |                                      |                                                               |
|------------------------------------|---------------------------------------------------------------------------------------------------------------------------|--------------------------------------------------------------------|---------------------------------------------------------|---------------------------------------------------------|----------------------|----------------------|------------------|--------------------------------------|---------------------------------------------------------------|
| Palmas<br>2010<br>31,32            | Telemedicine with nurse case management (5 yrs)                                                                           | United States, multiple primary care practices                     | DM, age $\geq 55$ , living in under-served areas        | RCT, SQ                                                 | 844                  | 821                  | 7.43%            | -0.29% (5 yrs)                       | n/a                                                           |
| Gordon<br>2014 <sup>34,35</sup>    | Automated telephone-linked system promoting self-management, with clinical targets set by PCP (0.5 yr)                    | Australia, urban, 2 academic hospitals                             | T2DM, HbA1c $\geq 7.5\%$                                | Model based on RCT, SQ                                  | 60                   | 60                   | 8.7%             | -0.6% (0.5 yr)                       | 0.004 QALY (5 yrs)                                            |
| Yu 2013<br>37,38                   | Clinical pharmacist/DM educator controlled DM, blood pressure, & cholesterol (1 $\rightarrow$ 10 yrs) ‡                   | United States, California, 2 clinics in integrated system          | T2DM, HbA1c $\geq 7\%$ , prior care by study pharmacist | Model based on matched CBA, SQ                          | 147 at study clinics | 147 at other clinics | 9.5%             | -1.7% (1 $\rightarrow$ 10 yrs)       | 0.49 QALY (10 yrs)                                            |
| Beaulieu<br>2006 <sup>39</sup>     | Diabetes disease management involving patient education and provider feedback and reminders (10 yrs)                      | United States, urban, health maintenance organization in Minnesota | DM                                                      | Serial cross-sectional analyses, SQ                     | 26,545 in year 10    | 13,120 at baseline   | 8.7% at baseline | -1.9% (at 10 yrs)                    | n/a                                                           |
| Long Term                          |                                                                                                                           |                                                                    |                                                         |                                                         |                      |                      |                  |                                      |                                                               |
| Gillett<br>2010 <sup>40,41</sup>   | Diabetes education and self-management program (1 yr)                                                                     | United Kingdom, 13 primary care trusts (162 practices)             | Newly diagnosed T2DM                                    | Model based on cluster RCT, SQ                          | 437                  | 387                  | 8.3%             | -0.06% (1 $\rightarrow$ 3 yrs)       | 0.0392 QALY<br>0.0283 LY (80 yrs)                             |
| Gillespie<br>2012 <sup>42,44</sup> | Group-based peer support with standardized DM care (2 yrs)                                                                | Ireland, 20 general practices                                      | T2DM                                                    | Model based on cluster RCT, SQ (with standardized care) | 192                  | 203                  | 7.06%            | -0.08% (2 yrs)                       | 0.09 QALY (40 yrs)                                            |
| O'Reilly<br>2012 <sup>45,46</sup>  | Web-based DM tracker that interfaced with EMR, gave MD and pt access, and had automated telephone reminders (1 yr)        | Canada, 47 primary care practices in 3 regions                     | T2DM                                                    | Model based on RCT, SQ                                  | 253                  | 258                  | 7.0%             | -0.2% (1 yr)                         | 0.0201 QALY<br>0.0245 LY (40 yrs)                             |
| Gilmer<br>2012 <sup>47,48</sup>    | EMR-based clinical decision support with drug-specific advice plus reorganized clinic workflow (0.5 $\rightarrow$ 40 yrs) | United States, 11 clinics in a large medical group                 | DM, HbA1c $\geq 7.0\%$                                  | Model based on cluster RCT, SQ                          | 471                  | 621                  | 8.5%             | -0.26% (1 $\rightarrow$ 40 yrs)      | 0.04 QALY<br>0.03 LY (40 yrs)                                 |
| Mason<br>2006 <sup>49,50</sup>     | Protocol-driven call center that supported patient education, self-care, and referrals (1 yr $\rightarrow$ lifetime)      | United Kingdom, small city, population-based registry              | T2DM                                                    | RCT, SQ                                                 | 394                  | 197                  | 7.9%             | -0.31% (1 yr $\rightarrow$ lifetime) | 0.103 QALY<br>0.320 LY (lifetime)                             |
| Dijkstra<br>2006 <sup>51,52</sup>  | Education, reminders and feedback for health professionals (1 yr)                                                         | Netherlands, clinics at 13 general hospitals                       | T2DM                                                    | Model based on cluster RCT, SQ                          | 248                  | 276                  | 8.1%             | -0.4% (1 yr)                         | 0.29 QALY (0.133 QALY discounted at 3%)<br>0.34 LY (lifetime) |
|                                    | Same plus education and "diabetes passports" for patients (1 yr)                                                          |                                                                    |                                                         |                                                         | 240                  |                      | 8.0%             | -0.5% (1 yr)                         | 0.59 QALY (0.276 discounted at 3%)                            |

SUPPLEMENTARY DATA

|                                |                                                                                                                                                                                 |                                                                                                             |                                                    |                                             |                               |                                |                      |                             |                                                                                          |
|--------------------------------|---------------------------------------------------------------------------------------------------------------------------------------------------------------------------------|-------------------------------------------------------------------------------------------------------------|----------------------------------------------------|---------------------------------------------|-------------------------------|--------------------------------|----------------------|-----------------------------|------------------------------------------------------------------------------------------|
|                                |                                                                                                                                                                                 |                                                                                                             |                                                    |                                             |                               |                                |                      |                             | 0.53 LY (lifetime)                                                                       |
| Slingerland 2013 <sup>53</sup> | Patient-centered care, patient education, diabetes passports, feedback to physicians and nurses (1 yr → lifetime)                                                               | Netherlands, clinics at 13 hospitals                                                                        | T2DM                                               | Model based on cluster RCT, SQ with DM team | 240                           | 276                            | >8.5%:<br>mean 9.5%  | -0.83%<br>(1 yr → lifetime) | 0.54 QALY (lifetime)                                                                     |
|                                |                                                                                                                                                                                 |                                                                                                             |                                                    |                                             |                               |                                | 7-8.5%:<br>mean 7.7% | -0.49%<br>(1 yr → lifetime) | 0.24 QALY (lifetime)                                                                     |
| Prezio 2014 <sup>54,55</sup>   | Diabetes education and self-management program tailored to low literacy Mexican American population (1 → 20 yrs)                                                                | United States, urban, 1 community clinic                                                                    | T2DM, uninsured, Mexican-American                  | Model based on RCT, SQ                      | 90                            | 90                             | 8.9%                 | -0.7%<br>(1 → 20 yrs)       | 0.056 QALY<br>0.0354 LY (20 yrs)                                                         |
| Schouten 2010 <sup>56</sup>    | QI collaboratives that developed multidisciplinary teams, introduced patient self-management, created registry of clinical parameters, and used plan-do-study-act cycles (1 yr) | Netherlands, 37 general practices and 13 outpatient clinics                                                 | T2DM                                               | Model based on CBA, SQ                      | 607 in 6 regions (54.8% male) | 1,254 in 9 regions             | 7.5%                 | No change (2 yrs)           | 0.26 QALY<br>0.76 LY female,<br>0.33 QALY<br>0.97 LY male (lifetime, discounted at 1.5%) |
| Gilmer 2007 <sup>19,57</sup>   | Culturally-specific self-management training by nurse/diabetes educator, dietician, medical assistant; education by peer educators (1 → 40 yrs)                                 | United States, urban, 4 cohorts defined by insurance status                                                 | DM                                                 | Model based on CBA, SQ                      | Commercial 575                |                                | 7.8%                 | -0.4%<br>(1 → 40 yrs)       | 0.18 QALY<br>0.20 LY (40 yrs)                                                            |
|                                |                                                                                                                                                                                 |                                                                                                             |                                                    |                                             | Medicaid 1,213                |                                | 8.2%                 | -0.5%<br>(1 → 40 yrs)       | 0.26 QALY<br>0.30 LY (40 yrs)                                                            |
|                                |                                                                                                                                                                                 |                                                                                                             |                                                    |                                             | County 1,345                  |                                | 8.6%                 | -0.8%<br>(1 → 40 yrs)       | 0.44 QALY<br>0.60 LY (40 yrs)                                                            |
|                                |                                                                                                                                                                                 |                                                                                                             |                                                    |                                             | Uninsured 760                 |                                | 9.4%                 | -1.3%<br>(1 → 40 yrs)       | 0.89 QALY<br>1.1 LY (40 yrs)                                                             |
| Kuo 2011 <sup>58,70</sup>      | Chronic Care Model with multidisciplinary DM-specific team (up to 3 → 20 yrs)                                                                                                   | United States, diabetes clinic at an Air Force Medical Center                                               | T2DM, age 50, no complications                     | Model based on CBA, SQ                      | 196 treated in study clinic   | 1,221 treated in other clinics | 6.8%                 | -0.6%<br>(up to 3 → 20 yrs) | 0.117 QALY (20 yrs)                                                                      |
| McRae 2008 <sup>59</sup>       | Centralized database used to promote guideline implementation via reminders, feedback, and guidance to providers (5 → 40 yrs)                                                   | Australia, regional network with 16 general practices                                                       | T2DM, participated for 5 yrs, had all desired data | Model based on UCBA, SQ                     | 74 in model; 1,087 in program | n/a                            | 6.9%                 | 0.3%<br>(5 yrs)             | 0.30 QALE<br>0.36 LY (40 yrs)                                                            |
| Giorda 2013 <sup>60,61</sup>   | Physician-led initiative related to glycemic control and CVD risk factors (5 → 50 yrs)                                                                                          | Italy, about 224 diabetes treatment centers with 1/6 <sup>th</sup> of all patients with T2DM in the country | T2DM, participated for 5 yrs                       | Model based on UCBA, SQ                     | 195,851                       | n/a                            | 7.8%                 | -0.2%<br>(1 → 50 yrs)       | 0.48 QALY<br>0.55 LY (50 yrs)                                                            |
| Huang                          | Collaborative conducted in                                                                                                                                                      | United States, 17 health                                                                                    | T2DM                                               | Model based                                 | 80                            | n/a                            | 8.53%                | -0.45%                      | 0.35 QALY                                                                                |

## SUPPLEMENTARY DATA

|                                |                                                                                                                                              |                                                                               |                                                |                               |       |     |       |                            |                                     |
|--------------------------------|----------------------------------------------------------------------------------------------------------------------------------------------|-------------------------------------------------------------------------------|------------------------------------------------|-------------------------------|-------|-----|-------|----------------------------|-------------------------------------|
| 2007 <sup>62,63</sup>          | community health centers (4 yrs)                                                                                                             | centers                                                                       |                                                | on serial cross-section, SQ   |       |     |       | (4 yrs)                    | 0.35 LY (lifetime)                  |
| Brownson 2009 <sup>65</sup>    | Self-management training that included patient education, telephone follow-up, counseling, goal setting, support groups (1-4 yrs → lifetime) | United States, nonprofit community-based health care organization in 4 states | T2DM, Hispanic or African American, low-income | Model based on UCBA, SQ       | 2,920 | n/a | NR    | -0.5% (1-4 yrs → lifetime) | 0.297 QALY<br>0.54 LY (lifetime)    |
| O'Reilly 2007 <sup>66,67</sup> | Multidisciplinary primary care diabetes management program (1.5 yrs)                                                                         | Canada, multidisciplinary health services organization                        | DM                                             | Model based on UCBA, SQ       | 401   | n/a | 8.14% | -1.02% (1 yr)              | 0.1075 QALY<br>0.8400 LY (lifetime) |
| Gozzoli 2002 <sup>68</sup>     | Educational program, screening for DM complications and CVD risk factors (sustained)                                                         | Switzerland, hypothetical cohort                                              | T2DM                                           | Model based on literature, SQ | NR    | NR  | 7.4%  | assumed -1.6% (short term) | n/a                                 |
| Brown 2012 <sup>69</sup>       | Lifestyle modification program led by community health workers via home-based counseling and education (1.5 → 20 yrs)                        | United States, 1 clinic for medically underserved                             | T2DM, HbA1c >7%, Hispanic, low income          | Model based on UCBA, SQ       | 30    | n/a | 9.93% | -2.7% (1.5 → 20 yrs)       | 0.060 QALY<br>0.063 LY (20 yrs)     |

\* Abbreviations

Medical Diagnoses: DM = diabetes mellitus (type unspecified), T1DM = type 1 diabetes mellitus, T2DM = type 2 diabetes mellitus, CVD = cardiovascular disease, CHD = coronary heart disease; HTN = hypertension

Units of Time: mo = month, yr = year

Study designs: RCT = randomized controlled trial, NRCT = non-randomized controlled trial, CBA = controlled before-after analysis, UCBA = uncontrolled before-after analysis

HbA1c = hemoglobin A1c

HRQoL = health-related quality of life

Pt

=

Patient

NR = Not reported

SQ = status quo

QALY = quality-adjusted life-years/life-expectancy

LY = life-years/life expectancy

n/a = not applicable

† In studies that used uncontrolled designs (UCBA, serial cross-sectional analysis), the change in HbA1c represents the change from the baseline test to the follow-up test. In studies that used controlled designs (RCT, NRCT, or CBA), the change in HbA1c represents the difference between the intervention and control groups in the change the baseline test to the follow-up test.

‡ In the notation used (e.g., 1 → 10 yrs), the first number indicates the actual duration of the intervention or timing of the follow-up HbA1c test (in this example, 1 yr). The arrow and second number indicate that the authors assumed the intervention or change in HbA1c was sustained over a longer period (in this example, over 10 yrs).

SUPPLEMENTARY DATA

Table 3. Information Related to Economic Evaluation for Each Eligible Study\*

| Author and Year (Citation)     | Approach & Perspective                  | Time Horizon, Discount Rate | Year of Costs | Program Cost                                                | Healthcare Utilization Costs                                       | Types of Healthcare Utilization Included |             |                  |                  |                                                                         | Incremental Net Cost      | Incremental Cost-Effectiveness Ratio | mQHEs Score |
|--------------------------------|-----------------------------------------|-----------------------------|---------------|-------------------------------------------------------------|--------------------------------------------------------------------|------------------------------------------|-------------|------------------|------------------|-------------------------------------------------------------------------|---------------------------|--------------------------------------|-------------|
|                                |                                         |                             |               |                                                             |                                                                    | Clinic Visits                            | Medications | Laboratory Tests | Hospitalizations | Patient Costs                                                           |                           |                                      |             |
| <b>Short Term</b>              |                                         |                             |               |                                                             |                                                                    |                                          |             |                  |                  |                                                                         |                           |                                      |             |
| Handley 2008 <sup>1</sup>      | CEA, health system                      | 1 yr, n/a                   | 2004          | \$782 per pt                                                | \$0 (no difference)                                                | NR                                       | NR          | NR               | NR               |                                                                         | NR                        | \$65,167 per QALY                    | 111         |
| Wilson 2014 <sup>3</sup>       | CEA, single-payer system                | 1.5 yrs, n/a                | 2010          | \$60.18 per pt                                              | \$52.98 per pt                                                     | X                                        |             | X                | X                |                                                                         | \$113.16 per pt           | £7,778 per QALY                      | 98          |
| Sperl-Hillen 2010 <sup>5</sup> | Cost analysis, payer                    | 1 yr, n/a                   | 2009          | \$27 per pt                                                 | Included, not itemized                                             | X                                        | X           |                  |                  |                                                                         | -\$71 per pt              | n/a                                  | 87          |
| Eccles 2007 <sup>6</sup>       | Cost analysis, society                  | 1 yr, n/a                   | 2003          | £104,502 for 3,780 pts in average primary care trust        | -£12.41 per pt                                                     | X                                        | X           | X                |                  | Productivity, travel, other out of pocket costs (£7.15 per pt per year) | NR                        | n/a                                  | 93          |
| Allen 2013 <sup>8</sup>        | CEA, health system                      | 1 yr, n/a                   | 2010          | -\$57 per pt                                                | \$688 per pt                                                       | (PC)†                                    | X           | X                |                  |                                                                         | \$631 per pt              | n/a                                  | 100         |
| Katon 2012 <sup>10</sup>       | CEA, health system                      | 2 yrs, n/a                  | 2008          | \$1224 per pt                                               | Included, not itemized                                             | X                                        | X           | X                | X                | Specialty & mental health care                                          | -\$594 per pt             | n/a                                  | 113         |
| Houweling 2009 <sup>11</sup>   | Cost analysis, payer                    | 1 yr, n/a                   | 2003          | -€23.75 per pt                                              | -€273.80 per pt                                                    | (PC)                                     | X           | X                |                  |                                                                         | NR                        | n/a                                  | 92          |
| Noel 2004 <sup>12</sup>        | Cost analysis, integrated health system | 0.5 yr, n/a                 | 2002          | \$78,302 for 47 pts                                         | \$1,459 per pt                                                     | X#                                       |             |                  |                  | Transport                                                               | \$3,125 per pt            | n/a                                  | 100         |
| Kogut 2012 <sup>13</sup>       | Cost analysis, payer                    | 1 yr, n/a                   | 2010          | \$285 per pt                                                | -\$1,102 per pt                                                    | X                                        | (PC)        | X                | X                |                                                                         | -\$817 per pt             | n/a                                  | 85          |
| Sidorov 2002 <sup>14</sup>     | CEA, integrated health system           | 1 yr, n/a                   | 2001          | \$1.81 million for 3,118 pts                                | -\$1,294.32 per pt                                                 | X                                        | X           | X                | X                |                                                                         | NR                        | n/a                                  | 95          |
| Mousques 2010 <sup>16</sup>    | Cost analysis, health system            | 1 yr, n/a                   | 2005          | €60 per pt                                                  | -€81.28 per pt                                                     | X                                        |             |                  | X                |                                                                         | NR                        | n/a                                  | 76          |
| Spence 2014 <sup>3</sup>       | Cost analysis, integrated health system | 1 yr, n/a                   | 2010          | \$526,672 + \$52,396 per 40,000 pts with DM or dyslipidemia | -\$11,640,296 + \$1,134,400 per 40,000 pts with DM or dyslipidemia |                                          | X           |                  | X                |                                                                         | Return on investment 5.79 | n/a                                  | 97          |
| Nundy 2014                     | Cost analysis,                          | 0.5 yr,                     | 2012          | \$375 per pt                                                | -\$812 per pt                                                      | X                                        | X           | X                | X                |                                                                         | -\$437 per pt             | n/a                                  | 91          |

SUPPLEMENTARY DATA

|                                  |                                         |                |      |                          |                                               |      |   |   |             |                                                  |                                               |                            |     |
|----------------------------------|-----------------------------------------|----------------|------|--------------------------|-----------------------------------------------|------|---|---|-------------|--------------------------------------------------|-----------------------------------------------|----------------------------|-----|
| <sup>18</sup>                    | payer                                   | n/a            |      |                          |                                               |      |   |   |             |                                                  |                                               |                            |     |
| Gilmer 2005 <sup>19</sup>        | Cost analysis, payer                    | 1 yr, n/a      | 2002 | \$507 per pt             | \$839 per pt                                  | X    | X |   | X           |                                                  | \$1,346 per pt                                | n/a                        | 101 |
| Salzsieder 2011 <sup>20</sup>    | Cost analysis, payer                    | 1 yr, n/a      | 2009 | €2,850 per pt            | -€3,760 per pt                                | X    | X |   | X           |                                                  | -€910 per pt                                  | n/a                        | 82  |
| Franklin 2013 <sup>21</sup>      | Cost analysis, health system            | 1 yr, n/a      | 2011 | \$527.83 per pt          | -\$421 per pt                                 | X    | X | X | X           |                                                  | \$106.81 per pt                               | n/a                        | 108 |
| Steuten 2007 <sup>23</sup>       | CEA, society                            | 2 yrs, n/a     | 2002 | €21 per pt per 3 mo      | (back calculated to account for productivity) | X#   | X |   | X           | Productivity (-€27 per pt per 3 mo)              | -€29 per pt per 3 mo (including productivity) | n/a                        | 108 |
| Keers 2005 <sup>25</sup>         | Cost analysis, society                  | 1 yr, n/a      | 2003 | €1,327 per pt            | -€1,469 per pt including productivity, travel | X    |   |   | X           | Travel (-€7 per pt), productivity (-€543 per pt) | NR                                            | n/a                        | 103 |
| Haji 2013 <sup>26</sup>          | CEA, health system                      | 3 yrs, n/a     | 2010 | -AU\$1,489 per pt        | Included, not itemized                        | (PC) | X |   | (available) |                                                  | -AU\$826 per pt                               | n/a                        | 107 |
| Balamurugan 2006 <sup>27</sup>   | Cost analysis, health system            | 3 yrs, n/a     | 2003 | \$335 per pt             | -\$246 per pt                                 | X    | X | X | X           |                                                  | \$89 per pt                                   | n/a                        | 79  |
| Micklethwaite 2012 <sup>28</sup> | CEA, clinic/provider                    | 1 yr, n/a      | 2010 | \$140,279 per 81 pts     | -\$551 per pt                                 | X    |   |   | X           |                                                  | NR                                            | n/a                        | 104 |
| Garrett 2005 <sup>29</sup>       | Cost analysis, payer                    | 1 yr, n/a      | 2003 | \$351 per pt             | -\$1,269 per pt                               | X    | X |   | X           |                                                  | -\$918 per pt                                 | n/a                        | 91  |
| Snyder 2003 <sup>30</sup>        | Cost analysis, payer                    | 3 yrs, n/a     | 2001 | Included, not itemized   | -\$189.29 per pt per mo                       | X    |   | X | X           |                                                  | -\$986,538 over 7,407 pt-mo                   | n/a                        | 75  |
| <b>Intermediate Term</b>         |                                         |                |      |                          |                                               |      |   |   |             |                                                  |                                               |                            |     |
| Palmas 2010 <sup>31</sup>        | Cost analysis, health system            | 6 yrs, n/a     | 2006 | \$622 per pt per mo      | \$629 per pt per yr                           | X#   | X | X | X           |                                                  | NR                                            | n/a                        | 101 |
| Gordon 2014 <sup>34</sup>        | CEA, health system                      | 5 yrs, 5%      | 2011 | £533 per pt              | Included, not itemized                        | X    | X |   | X           |                                                  | -£683 per pt                                  | NR, intervention dominates | 110 |
| Yu 2013 <sup>37</sup>            | CEA, health system                      | 10 yrs, 3%     | 2011 | Included, not itemized   | Included, not itemized                        | X    | X | X | X           |                                                  | -\$8,788 per pt over 10 yrs                   | NR, intervention dominates | 108 |
| Beaulieu 2006 <sup>39</sup>      | Cost analysis, integrated health system | 10 yrs, 7%     | 2004 | \$233 per pt over 10 yrs | -\$5,560 per pt at 10 yrs vs. at baseline     | X    | X | X | X           |                                                  | -\$5,345 per pt at 10 yrs vs. at baseline     | n/a                        | 84  |
| <b>Long Term</b>                 |                                         |                |      |                          |                                               |      |   |   |             |                                                  |                                               |                            |     |
| Gillett 2010 <sup>40</sup>       | CEA, single-payer system                | lifetime, 3.5% | 2008 | £219 per pt              | -£10 per pt                                   | X    | X | X | X           |                                                  | £209 per pt                                   | £5,387 per QALY            | 111 |

SUPPLEMENTARY DATA

|                                                       |                                   |                         |      |                                                          |                                  |    |   |   |   |                      |                              |                                    |     |
|-------------------------------------------------------|-----------------------------------|-------------------------|------|----------------------------------------------------------|----------------------------------|----|---|---|---|----------------------|------------------------------|------------------------------------|-----|
| Gillespie 2012 <sup>42</sup>                          | CEA, society                      | 40 yrs, 3.5%            | 2008 | €246 per pt                                              | Included                         | X  | X | X | X | Travel, productivity | -€623 per pt                 | NR, intervention dominates         | 108 |
| O'Reilly 2012 <sup>45</sup>                           | CEA, single-payer system          | 40 yrs, 3%‡             | 2010 | C\$1,912 per pt                                          | Included, not itemized           | X  | X | X | X |                      | C\$2,048 per pt              | C\$102,053 per QALY                | 110 |
| Gilmer 2012 <sup>47</sup>                             | CEA, single-payer system          | 40 yrs, 3%              | 2009 | \$81 per pt in first yr, \$37 per pt per yr in later yrs | Included, not itemized           | X# | X | X | X | Dental, equipment    | \$803 per pt over 40 yrs     | \$21,690 per QALY                  | 108 |
| Mason 2006 <sup>49</sup>                              | CEA, health system                | lifetime, 5%            | 2003 | £1,088 per pt over lifetime                              | Included, not itemized           | X  | X | X | X |                      | NR                           | £43,500 per QALY                   | 113 |
| Dijkstra 2006 <sup>51,71</sup> , Provider             | CEA, payer                        | lifetime, 3%            | 2001 | €2.00 per pt per yr                                      | Included, not itemized           | X  | X | X | X |                      | €9,389 per pt over lifetime  | €70,630 per QALY                   | 106 |
| Dijkstra 2006 <sup>51,71</sup> , Provider and patient | CEA, payer                        | lifetime, 3%            | 2001 | €3.50 per pt per yr                                      | Included, not itemized           | X  | X | X | X |                      | €9,620 per pt over lifetime  | €34,808 per QALY                   | 106 |
| Slingerland 2013 <sup>53</sup> , HbA1c >8.5%          | CEA, integrated health system     | lifetime, 3% cost only‡ | 2000 | \$3.70 per pt per yr                                     | Included, not itemized           | X  | X | X | X |                      | \$3,482 per pt over lifetime | \$6,443 per QALY                   | 108 |
| Slingerland 2013 <sup>53</sup> , HbA1c 7-8.5%         | CEA, integrated health system     | lifetime, 3% cost only‡ | 2000 | \$3.70 per pt per yr                                     | Included, not itemized           | X  | X | X | X |                      | \$4,731 per pt over lifetime | \$20,086 per QALY                  | 108 |
| Prezio 2014 <sup>54</sup>                             | CEA, society                      | 20 yrs, 3%              | 2012 | \$4,958 per pt                                           | Included, not itemized           | X  | X | X | X |                      | Included, not itemized       | \$355 per QALY                     | 105 |
| Schouten 2010 <sup>56</sup> , Women                   | CEA, payer in single-payer system | lifetime, 3% ‡          | 2006 | €22.19 per pt                                            | €643 per pt (discounted at 4.5%) | X  | X | X | X |                      | Included, not itemized       | €6,672 per QALY (discounted at 3%) | 111 |
| Schouten 2010 <sup>56</sup> , Men                     | CEA, single-payer system          | lifetime, 3% ‡          | 2006 | €22.19 per pt                                            | €860 per pt (discounted at 4.5%) | X  | X | X | X |                      | Included, not itemized       | €7,614 per QALY (discounted at 3%) | 111 |
| Gilmer 2007 <sup>57</sup> , Commercial                | CEA, payer                        | 40 yrs, 3%              | 2003 | \$507 per pt per yr                                      | Included, not itemized           | X  | X | X | X |                      | \$12,368 per pt over 40 yrs  | \$69,587 per QALY                  | 104 |
| Gilmer 2007 <sup>57</sup> , Medicaid                  | CEA, payer                        | 40 yrs, 3%              | 2003 | \$507 per pt per yr                                      | Included, not itemized           | X  | X | X | X |                      | \$11,792 per pt over 40 yrs  | \$44,941 per QALY                  | 104 |
| Gilmer 2007                                           | CEA,                              | 40 yrs,                 | 2003 | \$507 per pt                                             | Included, not                    | X  | X | X | X |                      | \$10,921 per                 | \$24,584 per                       | 104 |



## SUPPLEMENTARY DATA

|                                       |                                           |              |      |                                                                         |                        |   |      |   |   |                                           |                                      |                             |     |
|---------------------------------------|-------------------------------------------|--------------|------|-------------------------------------------------------------------------|------------------------|---|------|---|---|-------------------------------------------|--------------------------------------|-----------------------------|-----|
| <sup>57</sup> , County                | payer                                     | 3%           |      | per yr                                                                  | itemized               |   |      |   |   |                                           | pt over 40 yrs                       | QALY                        |     |
| Gilmer 2007 <sup>57</sup> , Uninsured | CEA, payer                                | 40 yrs, 3%   | 2003 | \$507 per pt per yr                                                     | Included, not itemized | X | X    | X | X |                                           | \$8,991 per pt over 40 yrs           | \$10,141 per QALY           | 104 |
| Kuo 2011 <sup>58</sup>                | CEA, integrated health system and society | 20 yrs, 3%   | 2010 | Included, not itemized                                                  | Included, not itemized | X | X    | X | X | Patient out-of-pocket costs, productivity | \$4,909 per pt over 20 yrs (society) | \$42,051 per QALY (society) | 111 |
| McRae 2008 <sup>59</sup>              | CEA, health system                        | 40 yrs, 5%   | 2005 | +AU\$196 per pt per yr                                                  | -AU\$617 per pt        | X | X    | X | X |                                           | AU\$2,919 per pt                     | AU\$9,730 per QALE          | 109 |
| Giorda 2013 <sup>60</sup>             | CEA, single-payer system                  | 50 yrs, 3%   | 2010 | €871 per pt                                                             | Included, not itemized | X | (PC) | X | X |                                           | -€3,786 per pt                       | NR, intervention dominates  | 110 |
| Huang 2007 <sup>63</sup>              | CEA, society                              | lifetime, 3% | 2004 | \$1,784 per pt per 3 yrs plus \$378 per pt per yr for lifetime          | Included, not itemized | X | X    | X | X |                                           | \$11,685 per pt over lifetime        | \$33,386 per QALY           | 115 |
| Brownson 2009 <sup>65</sup>           | CEA, health system                        | lifetime, 3% | 2006 | \$15,031 per pt                                                         | -\$3,385 per pt        | X | X    | X | X |                                           | \$11,760 per pt                      | \$39,563 per QALY           | 109 |
| O'Reilly 2007 <sup>66</sup>           | CEA, integrated health system             | 40 yrs, 3%   | 2004 | C\$664 per pt                                                           | Included, not itemized | X | X    | X | X |                                           | C\$644 per pt                        | C\$5,992 per QALY           | 113 |
| Gozzoli 2002 <sup>68</sup>            | CEA, single-payer system                  | lifetime, 3% | 1996 | Included, not itemized                                                  | Included, not itemized | X | X    | X | X |                                           | -CHF7,313 per pt                     | NR, intervention dominates  | 105 |
| Brown 2012 <sup>69</sup>              | CEA, society                              | 20 yrs, 3%   | 2010 | \$1,176 per pt over 1.5 yrs plus \$141 per pt per yr from 1.5 to 20 yrs | Included, not itemized | X | X    | X | X | Travel, productivity                      | Included, not itemized               | \$33,319 per QALY           | 109 |

\* Abbreviations:

Currencies: C\$ = Canadian dollars, AU\$ = Australian dollars, CHF = Swiss Francs

Units of Time: mo = month, yr = year

CEA = cost-effectiveness analyses and related designs

DM = diabetes mellitus

QALY = quality-adjusted life years

QALE = quality-adjusted life expectancy

Pt = patient

NR = not reported

n/a = not applicable

† (PC) Authors included this utilization costs as part of program costs

‡ Authors presented data for several discount rates; results for 3% reported for consistency with other studies. # = includes home care

SUPPLEMENTARY DATA

Table 4. Assessment of Bias in RCTs using Cochrane Collaboration Tool

| Author and Year          | Random sequence generation | Allocation concealment | Blinding of participants and personnel | Blinding of outcome assessment | Incomplete outcome data addressed | Selective reporting |
|--------------------------|----------------------------|------------------------|----------------------------------------|--------------------------------|-----------------------------------|---------------------|
| <b>Short Term</b>        |                            |                        |                                        |                                |                                   |                     |
| Handley 2008             | ?                          | ?                      | -                                      | ?                              | +                                 | ?                   |
| Wilson 2014              | +                          | ?                      | -                                      | ?                              | -                                 | +                   |
| Sperl-Hillen 2010        | ?                          | ?                      | -                                      | ?                              | -                                 | +                   |
| Eccles 2007              | +                          | ?                      | -                                      | -                              | -                                 | +                   |
| Allen 2013               | +                          | ?                      | -                                      | +                              | +                                 | +                   |
| Katon 2012               | ?                          | ?                      | -                                      | +                              | +                                 | +                   |
| Houweling 2009           | -                          | ?                      | -                                      | +                              | +                                 | +                   |
| Noel 2004                | ?                          | ?                      | -                                      | -                              | -                                 | ?                   |
| <b>Intermediate Term</b> |                            |                        |                                        |                                |                                   |                     |
| Palmas 2010              | ?                          | ?                      | -                                      | +                              | -                                 | +                   |
| Gordon 2014              | +                          | ?                      | -                                      | -                              | +                                 | +                   |
| <b>Long Term</b>         |                            |                        |                                        |                                |                                   |                     |
| Gillett 2010             | ?                          | ?                      | -                                      | ?                              | +                                 | ?                   |
| Gillespie 2012           | +                          | -                      | -                                      | ?                              | +                                 | +                   |
| O'Reilly 2012            | +                          | +                      | -                                      | +                              | +                                 | +                   |
| Gilmer 2012              | ?                          | ?                      | -                                      | ?                              | +                                 | +                   |
| Mason 2006               | ?                          | ?                      | -                                      | ?                              | ?                                 | +                   |
| Dijkstra 2006            | ?                          | +                      | -                                      | ?                              | -                                 | +                   |
| Slingerland 2013         | ?                          | +                      | -                                      | -                              | +                                 | +                   |
| Prezio 2014              | +                          | ?                      | -                                      | ?                              | +                                 | ?                   |

Legend: +, present; -, absent; ?, uncertain if present or absent.

SUPPLEMENTARY DATA

**Table 5. Assessment of Bias in Observational Studies Using the Newcastle-Ottawa Scale (NOS)**

|                          | Selection                               |                                    |                              | Comparability                                                            |                                                |                                             | Outcome                  |                                              |                                  |
|--------------------------|-----------------------------------------|------------------------------------|------------------------------|--------------------------------------------------------------------------|------------------------------------------------|---------------------------------------------|--------------------------|----------------------------------------------|----------------------------------|
|                          | 1. Representativeness of exposed cohort | 2. Selection of non-exposed cohort | 3. Ascertainment of exposure | 4. Demonstration that outcome of interest was not present at study start | 1. Study control for most important confounder | 2. Study controls for any additional factor | 1. Assessment of outcome | 2. Follow-up long enough to capture outcomes | 3. Adequacy of follow-up cohorts |
| <b>Short Term</b>        |                                         |                                    |                              |                                                                          |                                                |                                             |                          |                                              |                                  |
| Kogut 2012               | 0                                       | 0                                  | *                            | *                                                                        | *                                              | *                                           | *                        | *                                            | *                                |
| Sidorov 2002             | 0                                       | 0                                  | *                            | *                                                                        | 0                                              | 0                                           | *                        | *                                            | 0                                |
| Mousques 2010            | *                                       | *                                  | *                            | *                                                                        | *                                              | *                                           | *                        | *                                            | *                                |
| Spence 2014              | 0                                       | *                                  | *                            | *                                                                        | *                                              | *                                           | *                        | *                                            | 0                                |
| Nundy 2014               | 0                                       | 0                                  | *                            | *                                                                        | 0                                              | 0                                           | *                        | *                                            | 0                                |
| Gilmer 2005              | *                                       | 0                                  | *                            | *                                                                        | *                                              | *                                           | *                        | *                                            | 0                                |
| Salzsieder 2011          | 0                                       | 0                                  | *                            | *                                                                        | 0                                              | 0                                           | *                        | *                                            | 0                                |
| Franklin 2013            | *                                       | 0                                  | *                            | *                                                                        | 0                                              | 0                                           | *                        | *                                            | 0                                |
| Steuten 2007             | *                                       | 0                                  | *                            | *                                                                        | 0                                              | 0                                           | *                        | *                                            | *                                |
| Keers 2005               | *                                       | 0                                  | *                            | *                                                                        | 0                                              | 0                                           | *                        | *                                            | *                                |
| Haji 2013                | *                                       | *                                  | *                            | *                                                                        | *                                              | *                                           | *                        | *                                            | *                                |
| Balamurugan 2006         | *                                       | *                                  | *                            | *                                                                        | *                                              | *                                           | *                        | *                                            | 0                                |
| Micklethwaite 2012       | 0                                       | 0                                  | *                            | *                                                                        | 0                                              | 0                                           | *                        | *                                            | 0                                |
| Garrett 2005             | 0                                       | 0                                  | *                            | *                                                                        | 0                                              | 0                                           | *                        | *                                            | 0                                |
| Snyder 2003              | *                                       | 0                                  | *                            | *                                                                        | 0                                              | 0                                           | *                        | *                                            | 0                                |
| <b>Intermediate Term</b> |                                         |                                    |                              |                                                                          |                                                |                                             |                          |                                              |                                  |
| Yu 2013                  | *                                       | *                                  | *                            | *                                                                        | *                                              | *                                           | *                        | *                                            | *                                |
| Beaulieu 2006            | *                                       | 0                                  | *                            | *                                                                        | 0                                              | 0                                           | *                        | *                                            | 0                                |
| <b>Long Term</b>         |                                         |                                    |                              |                                                                          |                                                |                                             |                          |                                              |                                  |
| Schouten 2010            | *                                       | *                                  | *                            | *                                                                        | 0                                              | 0                                           | *                        | *                                            | 0                                |
| Gilmer 2007              | *                                       | 0                                  | *                            | *                                                                        | 0                                              | 0                                           | *                        | *                                            | 0                                |
| Kuo 2011                 | 0                                       | *                                  | *                            | *                                                                        | *                                              | *                                           | *                        | *                                            | 0                                |
| McRae 2008               | *                                       | 0                                  | *                            | *                                                                        | 0                                              | 0                                           | *                        | *                                            | 0                                |
| Giorda 2003              | N/A                                     |                                    |                              |                                                                          |                                                |                                             |                          |                                              |                                  |
| Huang 2007               | *                                       | 0                                  | *                            | *                                                                        | *                                              | *                                           | *                        | *                                            | 0                                |

SUPPLEMENTARY DATA

|               |     |   |   |   |   |   |   |   |   |
|---------------|-----|---|---|---|---|---|---|---|---|
| Brownson 2009 | *   | 0 | * | * | 0 | 0 | * | * | 0 |
| O'Reilly 2007 | *   | 0 | * | * | 0 | 0 | * | * | 0 |
| Gozzoli 2002  | N/A |   |   |   |   |   |   |   |   |
| Brown 2012    | *   | 0 | * | * | 0 | 0 | * | * | 0 |

Legend: \*, criterion met; 0, criterion not met; N/A: Not applicable because cost analysis was based on data from multiple studies.

## SUPPLEMENTARY DATA

**Table 6. Funding Sources and MQCS Components**

| Author (Year)                           | Funding Source         | MQCS Components Described in Article |                    |                   |
|-----------------------------------------|------------------------|--------------------------------------|--------------------|-------------------|
|                                         |                        | Implementation                       | Adherence/Fidelity | Penetration/Reach |
| Handley 2008 <sup>1</sup>               | Government, Non-profit | X                                    |                    |                   |
| Wilson 2014 <sup>3</sup>                | Government             | X                                    | X                  | X                 |
| Sperl-Hillen 2010 <sup>5</sup>          | Government             | X                                    |                    |                   |
| Eccles 2007 <sup>6</sup>                | Government             | X                                    | X                  |                   |
| Allen 2013 <sup>8</sup>                 | Government             | X                                    | X                  | X                 |
| Katon 2012 <sup>10</sup>                | Government, Non-profit | X                                    | X                  | X                 |
| Houweling 2009 <sup>11</sup>            | Government, Non-profit |                                      |                    |                   |
| Noel 2004 <sup>12</sup>                 | Government, Commercial | X                                    | X                  | X                 |
| Kogut 2012 <sup>13</sup>                | Commercial             | X                                    | X                  | X                 |
| Sidorov 2002 <sup>14,15</sup>           | Not reported           |                                      |                    |                   |
| Mousques 2010 <sup>16</sup>             | Not reported           |                                      |                    |                   |
| Spence 2014 <sup>17</sup>               | Not reported           | X                                    |                    |                   |
| Nundy 2014 <sup>18</sup>                | Non-profit, Commercial | X                                    |                    |                   |
| Gilmer 2005 <sup>19</sup>               | Non-profit             |                                      | X                  | X                 |
| Salzsieder 2011 <sup>20</sup>           | Government             |                                      | X                  |                   |
| Franklin 2013 <sup>21</sup>             | Government             |                                      |                    | X                 |
| Steuten 2007 <sup>23,24</sup>           | Not reported           | X                                    | X                  | X                 |
| Keers 2005 <sup>25</sup>                | Not reported           | X                                    |                    |                   |
| Haji 2013 <sup>26</sup>                 | Government             | X                                    |                    | X                 |
| Balamurugan 2006 <sup>27</sup>          | Commercial             |                                      | X                  | X                 |
| Micklethwaite 2012 <sup>28</sup>        | Government, Non-profit | X                                    | X                  | X                 |
| Garrett 2005 <sup>29</sup>              | Commercial             |                                      |                    | X                 |
| Snyder 2003 <sup>30</sup>               | Not reported           | X                                    | X                  |                   |
| Palmas 2010 <sup>31</sup>               | Government             |                                      |                    |                   |
| Gordon 2014 <sup>34</sup>               | Government             | X                                    |                    |                   |
| Yu 2013 <sup>37</sup>                   | Non-profit             | X                                    |                    |                   |
| Beaulieu 2006 <sup>39</sup>             | Non-profit             |                                      |                    |                   |
| Gillett 2010 <sup>40</sup>              | Government, Non-profit | X                                    |                    | X                 |
| Gillespie 2012 <sup>42</sup>            | Government             | X                                    |                    |                   |
| O'Reilly 2012 <sup>45</sup>             | None                   | X                                    |                    |                   |
| Gilmer 2012 <sup>47</sup>               | Government             | X                                    |                    |                   |
| Mason 2006 <sup>49</sup>                | Commercial             | X                                    |                    | X                 |
| Dijkstra 2006 <sup>51,52</sup>          | Government             | X                                    |                    |                   |
| Slingerland 2013 <sup>53</sup>          | Government             | X                                    | X                  | X                 |
| Prezio 2014 <sup>54</sup>               | None                   | X                                    |                    | X                 |
| Schouten 2010 <sup>56</sup>             | Government             | X                                    |                    | X                 |
| Gilmer 2007, Uninsured <sup>19,57</sup> | Non-profit             |                                      | X                  | X                 |
| Kuo 2011 <sup>58</sup>                  | Government             |                                      |                    |                   |
| McRae 2008 <sup>59</sup>                | Government             |                                      | X                  |                   |

## SUPPLEMENTARY DATA

| Author (Year)               | Funding Source         | MQCS Components Described in Article |                    |                   |
|-----------------------------|------------------------|--------------------------------------|--------------------|-------------------|
|                             |                        | Implementation                       | Adherence/Fidelity | Penetration/Reach |
| Giorda 2013 <sup>60</sup>   | Commercial             | X                                    |                    | X                 |
| Huang 2007 <sup>63</sup>    | Government             | X                                    |                    |                   |
| Brownson 2009 <sup>65</sup> | Non-profit             | X                                    | X                  | X                 |
| O'Reilly 2007 <sup>66</sup> | Government             | X                                    | X                  | X                 |
| Gozzoli 2002 <sup>68</sup>  | Not reported           |                                      |                    |                   |
| Brown 2012 <sup>69</sup>    | Government, Non-profit |                                      | X                  | X                 |

SUPPLEMENTARY DATA

Supplement 5. Results of Unadjusted Weighted Regression Analyses for Change in HbA1c in RCTs

Table. Randomized Controlled Trials of QI Interventions Designed to Improve Glycemic Control: Factors Predicting Change in Change in HbA1c, Weighted by Population Size in Intervention Group

| Predictor                     | k  | Change in HbA1c,<br>Mean (95% CI) | p            |
|-------------------------------|----|-----------------------------------|--------------|
| Overall Change in HbA1c       | 19 | -0.26% (-0.35%, -0.17%)           |              |
| Baseline HbA1c                | 19 |                                   | <b>0.010</b> |
| 7.5% (58 mmol/mol)            |    | -0.22% (-0.29%,-0.14%)            |              |
| 8.5% (69 mmol/mol)            |    | -0.40% (-0.52%,-0.29%)            |              |
| Timing of Study               | 19 |                                   | 0.093        |
| 2004                          |    | -0.33% (-0.43%,-0.22%)            |              |
| 2009                          |    | -0.22% (-0.31%,-0.12%)            |              |
| System-oriented Strategies    | 19 |                                   | 0.538        |
| Mean No. of Strategies (1.63) |    | -0.26% (-0.34%,-0.18%)            |              |
| One More Strategy (2.63)      |    | -0.28% (-0.38%,-0.18%)            |              |
| Disease Management            | 10 | -0.33% (-0.46%,-0.19%)            | 0.241        |
| No Disease Management         | 9  | -0.22% (-0.32%,-0.12%)            |              |
| Team Changes                  | 8  | -0.31% (-0.46%,-0.16%)            | 0.414        |
| No Team Changes               | 11 | -0.24% (-0.34%,-0.14%)            |              |
| Electronic Registry           | 3  | -0.29% (-0.49%,-0.08%)            | 0.793        |
| No Electronic Registry        | 16 | -0.26% (-0.35%,-0.16%)            |              |
| Facilitated Relay             | 7  | -0.39% (-0.55%,-0.23%)            | 0.084        |
| No Facilitated Relay          | 12 | -0.22% (-0.31%,-0.13%)            |              |
| Standardizing Care            | 6  | -0.20% (-0.31%,-0.10%)            | 0.113        |
| No Standardizing Care         | 13 | -0.34% (-0.46%,-0.22%)            |              |
| Provider-oriented Strategies  | 19 |                                   | 0.784        |
| Mean No. of Strategies (1.11) |    | -0.26% (-0.34%,-0.18%)            |              |
| One More Strategy (2.11)      |    | -0.25% (-0.37%,-0.13%)            |              |
| Audit and Feedback            | 7  | -0.26% (-0.38%,-0.15%)            | 0.990        |

SUPPLEMENTARY DATA

|                               |    |                        |       |
|-------------------------------|----|------------------------|-------|
| No Audit and Feedback         | 12 | -0.26% (-0.38%,-0.14%) |       |
|                               |    |                        |       |
| Provider Education            | 3  | -0.24% (-0.39%,-0.10%) | 0.784 |
| No Provider Education         | 16 | -0.27% (-0.37%,-0.17%) |       |
|                               |    |                        |       |
| Provider Decision Support     | 4  | -0.25% (-0.43%,-0.07%) | 0.916 |
| No Decision Support           | 15 | -0.26% (-0.36%,-0.17%) |       |
|                               |    |                        |       |
| Incentives for Providers      | 2  | -0.21% (-0.48%,0.06%)  | 0.691 |
| No Incentives                 | 17 | -0.27% (-0.35%,-0.18%) |       |
|                               |    |                        |       |
| Patient-oriented Strategies   | 19 |                        | 0.522 |
| Mean No. of Strategies (0.29) |    | -0.26% (-0.34%,-0.18%) |       |
| One More Strategy (1.29)      |    | -0.29% (-0.40%,-0.17%) |       |
|                               |    |                        |       |
| Tailoring Care for Group      | 7  | -0.26% (-0.38%,-0.14%) | 0.990 |
| No Tailoring Care             | 12 | -0.26% (-0.38%,-0.15%) |       |
|                               |    |                        |       |
| Patient Education             | 14 | -0.30% (-0.41%,-0.19%) | 0.320 |
| No Patient Education          | 5  | -0.21% (-0.34%,-0.09%) |       |
|                               |    |                        |       |
| Patient Self-Management       | 8  | -0.23% (-0.38%,-0.08%) | 0.656 |
| No Self-Management            | 11 | -0.27% (-0.37%,-0.17%) |       |
|                               |    |                        |       |
| Patient Reminders             | 5  | -0.30% (-0.46%,-0.13%) | 0.656 |
| No Patient Reminders          | 14 | -0.25% (-0.35%,-0.15%) |       |



## SUPPLEMENTARY DATA

### Supplement 6. Information Used to Standardize Costs

We used information reported by study authors (in table above) to standardize costs for economic evaluations with short-term or long-term time horizons. Too few studies had intermediate time horizons and the intermediate time horizons were too variable to facilitate comparisons.

#### Short-term Studies

Conversion of costs to 2015 U.S. dollars per patient per year: We extracted information reported by authors, converted to U.S. dollars, inflated to August 2015,\* and converted costs to an annual basis (e.g., for costs reported over 0.5 years, we multiplied by 2). When a category of costs was not reported, we used information from the other two categories to derive it (e.g., subtracting program costs from incremental net costs yields healthcare utilization and patient costs).

| Author and Year                  | Information Reported by Authors |               |                                               |              |                                          |                      | Conversion Factors * |                      |                            | Standardized Costs |                                          |                      |
|----------------------------------|---------------------------------|---------------|-----------------------------------------------|--------------|------------------------------------------|----------------------|----------------------|----------------------|----------------------------|--------------------|------------------------------------------|----------------------|
|                                  | Currency                        | Year of Costs | Number of Years over Which Costs Are Reported | Program Cost | Healthcare Utilization and Patient Costs | Incremental Net Cost | Currency Conversion  | Inflation Adjustment | Conversion to Annual Basis | Program Cost       | Healthcare Utilization and Patient Costs | Incremental Net Cost |
| Handley 2008 <sup>1</sup>        | USD                             | 2004          | 1.0                                           | 782          | 0                                        | .                    | \$1.00               | 1.43                 | 1.00                       | \$1,121            | \$0                                      | \$1,121              |
| Wilson 2014 <sup>3</sup>         | GBP                             | 2010          | 1.5                                           | 60           | 53                                       | 113.16               | \$1.57               | 1.15                 | 0.67                       | \$72               | \$64                                     | \$136                |
| Sperl-Hillen 2010 <sup>5</sup>   | USD                             | 2009          | 1.0                                           | 27           | .                                        | -71                  | \$1.00               | 1.19                 | 1.00                       | \$32               | -\$116                                   | -\$84                |
| Eccles 2007 <sup>6</sup>         | GBP                             | 2003          | 1.0                                           | 28           | -12                                      | .                    | \$1.64               | 1.50                 | 1.00                       | \$68               | -\$30                                    | \$37                 |
| Allen 2013 <sup>8</sup>          | USD                             | 2010          | 1.0                                           | -57          | 688                                      | .                    | \$1.00               | 1.15                 | 1.00                       | -\$66              | \$791                                    | \$725                |
| Katon 2012 <sup>10</sup>         | USD                             | 2008          | 2.0                                           | 1224         | .                                        | -594                 | \$1.00               | 1.23                 | 0.50                       | \$750              | -\$1,114                                 | -\$364               |
| Houweling 2009 <sup>11</sup>     | EUR                             | 2003          | 1.0                                           | -24          | -274                                     | .                    | \$1.13               | 1.50                 | 1.00                       | -\$40              | -\$465                                   | -\$505               |
| Noel 2004 <sup>12</sup>          | USD                             | 2002          | 0.5                                           | 1666         | 1459                                     | 3125                 | \$1.00               | 1.55                 | 2.00                       | \$5,179            | \$4,535                                  | \$9,714              |
| Kogut 2012 <sup>13</sup>         | USD                             | 2012          | 1.0                                           | 285          | -1102                                    | -817                 | \$1.00               | 1.07                 | 1.00                       | \$305              | -\$1,180                                 | -\$875               |
| Sidorov 2002 <sup>14</sup>       | USD                             | 2001          | 1.0                                           | 581          | -1294                                    | .                    | \$1.00               | 1.63                 | 1.00                       | \$945              | -\$2,106                                 | -\$1,162             |
| Mousques 2010 <sup>16</sup>      | EUR                             | 2005          | 1.0                                           | 60           | -81                                      | .                    | \$1.25               | 1.38                 | 1.00                       | \$103              | -\$140                                   | -\$37                |
| Spence 2014 <sup>17</sup>        | USD                             | 2010          | 1.0                                           | 14           | -263                                     | .                    | \$1.00               | 1.15                 | 1.00                       | \$17               | -\$302                                   | -\$285               |
| Nundy 2014 <sup>18</sup>         | USD                             | 2012          | 0.5                                           | 375          | -812                                     | -437                 | \$1.00               | 1.07                 | 2.00                       | \$803              | -\$1,739                                 | -\$936               |
| Gilmer 2005 <sup>19</sup>        | USD                             | 2002          | 1.0                                           | 507          | 839                                      | 1346                 | \$1.00               | 1.55                 | 1.00                       | \$788              | \$1,304                                  | \$2,092              |
| Salzsieder 2011 <sup>20</sup>    | EUR                             | 2009          | 1.0                                           | 2850         | -3760                                    | -910                 | \$1.39               | 1.19                 | 1.00                       | \$4,713            | -\$6,218                                 | -\$1,505             |
| Franklin 2013 <sup>21</sup>      | USD                             | 2011          | 1.0                                           | 528          | -421                                     | 107                  | \$1.00               | 1.11                 | 1.00                       | \$588              | -\$469                                   | \$119                |
| Steuten 2007 <sup>23</sup>       | EUR                             | 2002          | 2.0                                           | 168          | .                                        | -16                  | \$0.94               | 1.55                 | 0.50                       | \$123              | -\$135                                   | -\$12                |
| Keers 2005 <sup>25</sup>         | EUR                             | 2003          | 1.0                                           | 1327         | -919                                     | .                    | \$1.13               | 1.50                 | 1.00                       | \$2,252            | -\$1,560                                 | \$692                |
| Haji 2013 <sup>26</sup>          | AUD                             | 2010          | 3.0                                           | -1489        | .                                        | -826                 | \$0.92               | 1.15                 | 0.33                       | -\$525             | \$234                                    | -\$291               |
| Balamurugan 2006 <sup>27</sup>   | USD                             | 2003          | 3.0                                           | 335          | -246                                     | 89                   | \$1.00               | 1.50                 | 0.33                       | \$167              | -\$123                                   | \$44                 |
| Micklethwaite 2012 <sup>28</sup> | USD                             | 2010          | 1.0                                           | 1732         | -551                                     | .                    | \$1.00               | 1.15                 | 1.00                       | \$1,991            | -\$633                                   | \$1,357              |
| Garrett 2005 <sup>29</sup>       | USD                             | 2003          | 1.0                                           | 351          | -1269                                    | -918                 | \$1.00               | 1.50                 | 1.00                       | \$525              | -\$1,899                                 | -\$1,374             |
| Snyder 2003 <sup>30</sup>        | USD                             | 2001          | 1.0                                           | .            | -2271                                    | -1598                | \$1.00               | 1.63                 | 1.00                       | \$1,096            | -\$3,696                                 | -\$2,601             |

## SUPPLEMENTARY DATA

### Long-Term Studies

Conversion of costs to 2015 U.S. dollars per patient over study time horizon: We extracted information reported by authors, converted to U.S. dollars, and inflated to August 2015. These were the only changes applied to costs per QALY. To estimate the other cost components, we undertook additional steps.

1. As seen in Table 3 in the paper, several authors reported program costs on an annual basis. In this case, we discounted the recurring program costs over the long-term using a rate of 3%. For studies using a lifetime time horizon, we used 40 years.
2. If incremental net costs were not reported, we derived it by multiplying the cost per QALY by the number of QALYs per patient as listed in Table 2.
3. To derive healthcare utilization and patient costs for all but one study, we subtracted program costs from incremental net costs.
- 4.

| Author and Year                                   | Information Reported by Authors |               |              |              |                      |               | Conversion Factors * |                      | Standardized Estimates |                                          |                      |               |
|---------------------------------------------------|---------------------------------|---------------|--------------|--------------|----------------------|---------------|----------------------|----------------------|------------------------|------------------------------------------|----------------------|---------------|
|                                                   | Currency                        | Year of Costs | Time Horizon | Program Cost | Incremental Net Cost | Cost per QALY | Currency Conversion  | Inflation Adjustment | Program Cost           | Healthcare Utilization and Patient Costs | Incremental Net Cost | Cost per QALY |
| Gillett 2010 <sup>40</sup>                        | GBP                             | 2008          | lifetime     | 219          | 209                  | 5387          | \$1.86               | 1.23                 | \$498                  | -\$23                                    | \$475                | \$12,246      |
| Gillespie 2012 <sup>42</sup>                      | EUR                             | 2008          | 40           | 246          | -623                 | .             | \$1.47               | 1.23                 | \$443                  | -\$1,567                                 | -\$1,124             | .             |
| O'Reilly 2012 <sup>45</sup>                       | CAD                             | 2010          | 40           | 1912         | 2,048                | 102,053       | \$0.97               | 1.15                 | \$2,133                | \$152                                    | \$2,285              | \$113,871     |
| Gilmer 2012 <sup>47</sup>                         | USD                             | 2009          | 40           | annual       | 803                  | 21,690        | \$1.00               | 1.19                 | \$3,862                | -\$2,910                                 | \$952                | \$25,722      |
| Mason 2006 <sup>49</sup>                          | GBP                             | 2003          | 1.0          | 1088         | .                    | 43,500        | \$1.64               | 1.50                 | \$2,663                | .                                        | .                    | \$106,463     |
| Dijkstra 2006, Provider <sup>51</sup>             | EUR                             | 2001          | lifetime     | annual       | 9,398                | 70,630        | \$0.90               | 1.63                 | \$67                   | \$13,622                                 | \$13,689             | \$102,980     |
| Dijkstra 2006, Provider and patient <sup>51</sup> | EUR                             | 2001          | lifetime     | annual       | 9,620                | 34,808        | \$0.90               | 1.63                 | \$118                  | \$13,908                                 | \$14,026             | \$50,751      |
| Slingerland 2013 <sup>53</sup>                    | USD                             | 2000          | lifetime     | annual       | 3,482                | 6,443         | \$1.00               | 1.70                 | \$145                  | \$5,776                                  | \$5,921              | \$10,956      |
| Slingerland 2013 <sup>53</sup>                    | USD                             | 2000          | lifetime     | 86           | 4,731                | 20,086        | \$1.00               | 1.70                 | \$145                  | \$7,899                                  | \$8,045              | \$34,155      |
| Prezio 2014 <sup>54</sup>                         | USD                             | 2012          | 20           | 4958         | .                    | 355           | \$1.00               | 1.07                 | \$5,308                | -\$5,286                                 | \$21                 | \$380         |
| Schouten 2010 <sup>56</sup>                       | EUR                             | 2006          | 40           | 22           | .                    | 7,614         | \$1.26               | 1.32                 | \$37                   | \$2,845                                  | \$2,882              | \$11,084      |
| Schouten 2010 <sup>56</sup>                       | EUR                             | 2006          | 40           | 22           | .                    | 6,672         | \$1.26               | 1.32                 | \$37                   | \$4,137                                  | \$4,174              | \$12,648      |
| Gilmer 2007, Commercial <sup>57</sup>             | USD                             | 2003          | 40           | annual       | 12,368               | 69,587        | \$1.00               | 1.50                 | \$17,537               | \$971                                    | \$18,508             | \$104,132     |
| Gilmer 2007, Medicaid <sup>57</sup>               | USD                             | 2003          | 40           | annual       | 11,792               | 44,941        | \$1.00               | 1.50                 | \$17,537               | \$109                                    | \$17,646             | \$67,251      |
| Gilmer 2007, County <sup>57</sup>                 | USD                             | 200           | 40           | annual       | 10,921               | 24,584        | \$1.00               | 1.50                 | \$17,537               | -\$1,194                                 | \$16,343             | \$36,788      |

## SUPPLEMENTARY DATA

|                                      |     |      |          |        |        |        |        |      |          |          |           |          |
|--------------------------------------|-----|------|----------|--------|--------|--------|--------|------|----------|----------|-----------|----------|
|                                      |     | 3    |          |        |        |        |        |      |          |          |           |          |
| Gilmer 2007, Uninsured <sup>57</sup> | USD | 2003 | 40       | annual | 8,991  | 10,141 | \$1.00 | 1.50 | \$17,537 | -\$4,083 | \$13,454  | \$15,175 |
| Kuo 2011 <sup>58</sup>               | USD | 2010 | 20       | .      | 4,909  | 42,051 | \$1.00 | 1.15 | .        | .        | \$5,643   | \$48,337 |
| McRae 2008 <sup>59</sup>             | AUD | 2005 | 40       | annual | 3,745  | 9,730  | \$0.76 | 1.38 | \$4,762  | -\$826   | \$3,936   | \$10,228 |
| Giorda 2013 <sup>60</sup>            | EUR | 2010 | 50       | 871    | -3,786 | .      | \$1.33 | 1.15 | \$1,329  | -\$7,106 | -\$5,777  | .        |
| Huang 2007 <sup>63</sup>             | USD | 2004 | lifetime | annual | 11,685 | 33,386 | \$1.00 | 1.43 | \$6,316  | \$10,429 | \$16,745  | \$47,844 |
| Brownson 2009 <sup>65</sup>          | USD | 2006 | lifetime | 15,031 | 11,760 | 39,563 | \$1.00 | 1.32 | \$19,875 | -\$4,325 | \$15,550  | \$52,314 |
| O'Reilly 2007 <sup>66</sup>          | CAD | 2004 | 40       | 664    | 644    | 5,992  | \$0.77 | 1.43 | \$733    | -\$22    | \$711     | \$6,614  |
| Gozzoli 2002 <sup>68</sup>           | CHF | 1996 | lifetime | .      | -7,313 | .      | \$0.81 | 1.95 | .        | .        | -\$11,539 | .        |
| Brown 2012 <sup>69</sup>             | USD | 2010 | 20       | annual | .      | 33,319 | \$1.00 | 1.15 | \$3,519  | -\$1,210 | \$2,309   | \$38,300 |

\*Currency conversion: USForex Foreign Exchange Services, Historical Exchange Rates, available at: <http://www.usforex.com/forex-tools/historical-rate-tools/historical-exchange-rates>, last accessed August 31, 2016.

Inflation: Bureau of Labor Statistics, Consumer Price Index, Medical Care, available at: <http://www.bls.gov/cpi/home.htm#data>, last accessed July 24, 2016.

## SUPPLEMENTARY DATA

### REFERENCES

1. Handley MA, Shumway M, Schillinger D. Cost-effectiveness of automated telephone self-management support with nurse care management among patients with diabetes. *Annals of family medicine*. 2008;6(6):512-518.
2. Schillinger D, Hammer H, Wang F, et al. Seeing in 3-D: examining the reach of diabetes self-management support strategies in a public health care system. *Health education & behavior : the official publication of the Society for Public Health Education*. 2008;35(5):664-682.
3. Wilson A, O'Hare JP, Hardy A, et al. Evaluation of the clinical and cost effectiveness of intermediate care clinics for diabetes (ICCD): a multicentre cluster randomised controlled trial. *PloS one*. 2014;9(4):e93964.
4. Armstrong N, Baines D, Baker R, et al. A cluster randomized controlled trial of the effectiveness and cost-effectiveness of intermediate care clinics for diabetes (ICCD): study protocol for a randomized controlled trial. *Trials*. 2012;13:164.
5. Sperl-Hillen JM, O'Connor PJ, Rush WA, et al. Simulated physician learning program improves glucose control in adults with diabetes. *Diabetes care*. 2010;33(8):1727-1733.
6. Eccles MP, Whitty PM, Speed C, et al. A pragmatic cluster randomised controlled trial of a Diabetes REcall And Management system: the DREAM trial. *Implementation science : IS*. 2007;2:6.
7. Eccles M, Hawthorne G, Whitty P, et al. A randomised controlled trial of a patient based Diabetes Recall and Management System: the DREAM trial: a study protocol [ISRCTN32042030]. *BMC health services research*. 2002;2(1):5.
8. Allen JK, Dennison Himmelfarb CR, Szanton SL, Frick KD. Cost-effectiveness of Nurse Practitioner/Community Health Worker Care to Reduce Cardiovascular Health Disparities. *The Journal of cardiovascular nursing*. 2013.
9. Allen JK, Himmelfarb CR, Szanton SL, Bone L, Hill MN, Levine DM. COACH trial: a randomized controlled trial of nurse practitioner/community health worker cardiovascular disease risk reduction in urban community health centers: rationale and design. *Contemporary clinical trials*. 2011;32(3):403-411.
10. Katon W, Russo J, Lin EH, et al. Cost-effectiveness of a multicondition collaborative care intervention: a randomized controlled trial. *Archives of general psychiatry*. 2012;69(5):506-514.
11. Houweling ST, Kleefstra N, van Hateren KJ, et al. Diabetes specialist nurse as main care provider for patients with type 2 diabetes. *The Netherlands journal of medicine*. 2009;67(7):279-284.
12. Noel HC, Vogel DC, Erdos JJ, Cornwall D, Levin F. Home telehealth reduces healthcare costs. *Telemedicine journal and e-health : the official journal of the American Telemedicine Association*. 2004;10(2):170-183.
13. Kogut SJ, Johnson S, Higgins T, Quilliam B. Evaluation of a program to improve diabetes care through intensified care management activities and diabetes medication copayment reduction. *Journal of managed care pharmacy : JMCP*. 2012;18(4):297-310.
14. Sidorov J, Shull R, Tomcavage J, Girolami S, Lawton N, Harris R. Does diabetes disease management save money and improve outcomes? A report of simultaneous short-term savings and quality improvement associated with a health maintenance organization-sponsored disease management program among patients fulfilling health employer data and information set criteria. *Diabetes care*. 2002;25(4):684-689.
15. Sidorov J, Gabbay R, Harris R, et al. Disease management for diabetes mellitus: impact on hemoglobin A1c. *The American journal of managed care*. 2000;6(11):1217-1226.

## SUPPLEMENTARY DATA

16. Mousques J, Bourgueil Y, Le Fur P, Yilmaz E. Effect of a French experiment of team work between general practitioners and nurses on efficacy and cost of type 2 diabetes patients care. *Health policy (Amsterdam, Netherlands)*. 2010;98(2-3):131-143.
17. Spence MM, Makarem AF, Reyes SL, et al. Evaluation of an outpatient pharmacy clinical services program on adherence and clinical outcomes among patients with diabetes and/or coronary artery disease. *J Manag Care Spec Pharm*. 2014;20(10):1036-1045.
18. Nundy S, Dick JJ, Chou CH, Nocon RS, Chin MH, Peek ME. Mobile phone diabetes project led to improved glycemic control and net savings for Chicago plan participants. *Health affairs (Project Hope)*. 2014;33(2):265-272.
19. Gilmer TP, Philis-Tsimikas A, Walker C. Outcomes of Project Dulce: a culturally specific diabetes management program. *The Annals of pharmacotherapy*. 2005;39(5):817-822.
20. Salzsieder E, Augstein P. The Karlsburg Diabetes Management System: translation from research to eHealth application. *Journal of diabetes science and technology*. 2011;5(1):13-22.
21. Franklin BE, Farland MZ, Thomas J, McFarland MS, Ray SM, Byrd DC. Pharmacoeconomic analysis of the diabetes initiative program: a pharmacist-physician collaborative care model. *The Annals of pharmacotherapy*. 2013;47(12):1627-1634.
22. Farland MZ, Byrd DC, McFarland MS, et al. Pharmacist-physician collaboration for diabetes care: the diabetes initiative program. *The Annals of pharmacotherapy*. 2013;47(6):781-789.
23. Steuten LM, Bruijsten MW, Vrijhoef HJ. Economic evaluation of a diabetes disease management programme with a central role for the diabetes nurse specialist. *European Diabetes Nursing*. 2007;4(2):64-71.
24. Vrijhoef HJ, Spreeuwenberg C, Eijkelberg IM, Wolffenbuttel BH, van Merode GG. Adoption of disease management model for diabetes in region of Maastricht. *BMJ (Clinical research ed)*. 2001;323(7319):983-985.
25. Keers JC, Groen H, Sluiter WJ, Bouma J, Links TP. Cost and benefits of a multidisciplinary intensive diabetes education programme. *Journal of evaluation in clinical practice*. 2005;11(3):293-303.
26. Haji Ali Afzali H, Gray J, Beilby J, Holton C, Banham D, Karnon J. A risk-adjusted economic evaluation of alternative models of involvement of practice nurses in management of type 2 diabetes. *Diabetic medicine : a journal of the British Diabetic Association*. 2013;30(7):855-863.
27. Balamurugan A, Ohsfeldt R, Hughes T, Phillips M. Diabetes self-management education program for Medicaid recipients: a continuous quality improvement process. *The Diabetes educator*. 2006;32(6):893-900.
28. Mickelthwaite A, Brownson CA, O'Toole ML, Kilpatrick KE. The business case for a diabetes self-management intervention in a community general hospital. *Population health management*. 2012;15(4):230-235.
29. Garrett DG, Bluml BM. Patient self-management program for diabetes: first-year clinical, humanistic, and economic outcomes. *Journal of the American Pharmacists Association : JAPhA*. 2005;45(2):130-137.
30. Snyder JW, Malaskovitz J, Griego J, Persson J, Flatt K. Quality improvement and cost reduction realized by a purchaser through diabetes disease management. *Disease management : DM*. 2003;6(4):233-241.
31. Palmas W, Shea S, Starren J, et al. Medicare payments, healthcare service use, and telemedicine implementation costs in a randomized trial comparing telemedicine case management with usual care in medically underserved participants with diabetes mellitus (IDEATel). *Journal of the American Medical Informatics Association : JAMIA*. 2010;17:196-202.
32. Shea S, Weinstock RS, Teresi JA, et al. A randomized trial comparing telemedicine case management with usual care in older, ethnically diverse, medically underserved participants

## SUPPLEMENTARY DATA

- with diabetes mellitus: 5 year results of the IDEATel study. *Journal of the American Medical Informatics Association : JAMIA*. 2009;16:446-456.
33. Shea S, Weinstock RS, Starren J, et al. A randomized trial comparing telemedicine case management with usual care in older, ethnically diverse, medically underserved patients with diabetes mellitus. *Journal of the American Medical Informatics Association : JAMIA*. 2006;13(1):40-51.
  34. Gordon LG, Bird D, Oldenburg B, Friedman RH, Russell AW, Scuffham PA. A cost-effectiveness analysis of a telephone-linked care intervention for individuals with Type 2 diabetes. *Diabetes research and clinical practice*. 2014.
  35. Williams ED, Bird D, Forbes AW, et al. Randomised controlled trial of an automated, interactive telephone intervention (TLC Diabetes) to improve type 2 diabetes management: baseline findings and six-month outcomes. *BMC public health*. 2012;12:602.
  36. Bird D, Oldenburg B, Cassimatis M, et al. Randomised controlled trial of an automated, interactive telephone intervention to improve type 2 diabetes self-management (Telephone-Linked Care Diabetes Project): study protocol. *BMC public health*. 2010;10:599.
  37. Yu J, Shah BM, Ip EJ, Chan J. A Markov model of the cost-effectiveness of pharmacist care for diabetes in prevention of cardiovascular diseases: evidence from Kaiser Permanente Northern California. *Journal of managed care pharmacy : JMCP*. 2013;19(2):102-114.
  38. Ip EJ, Shah BM, Yu J, Chan J, Nguyen LT, Bhatt DC. Enhancing diabetes care by adding a pharmacist to the primary care team. *American journal of health-system pharmacy : AJHP : official journal of the American Society of Health-System Pharmacists*. 2013;70(10):877-886.
  39. Beaulieu N, Cutler DM, Ho K, et al. The Business Case for Diabetes Disease Management for Managed Care Organizations. *Frontiers in Health Policy Research*. 2006;9(1):1-36.
  40. Gillett M, Dallosso HM, Dixon S, et al. Delivering the diabetes education and self management for ongoing and newly diagnosed (DESMOND) programme for people with newly diagnosed type 2 diabetes: cost effectiveness analysis. *BMJ (Clinical research ed)*. 2010;341:c4093.
  41. Davies MJ, Heller S, Skinner TC, et al. Effectiveness of the diabetes education and self management for ongoing and newly diagnosed (DESMOND) programme for people with newly diagnosed type 2 diabetes: cluster randomised controlled trial. *BMJ (Clinical research ed)*. 2008;336(7642):491-495.
  42. Gillespie P, O'Shea E, Paul G, O'Dowd T, Smith SM. Cost effectiveness of peer support for type 2 diabetes. *International journal of technology assessment in health care*. 2012;28(1):3-11.
  43. Paul GM, Smith SM, Whitford DL, O'Shea E, O'Kelly F, O'Dowd T. Peer support in type 2 diabetes: a randomised controlled trial in primary care with parallel economic and qualitative analyses: pilot study and protocol. *BMC family practice*. 2007;8:45.
  44. Smith SM, Paul G, Kelly A, Whitford DL, O'Shea E, O'Dowd T. Peer support for patients with type 2 diabetes: cluster randomised controlled trial. *BMJ (Clinical research ed)*. 2011;342:d715.
  45. O'Reilly D, Holbrook A, Blackhouse G, Troyan S, Goeree R. Cost-effectiveness of a shared computerized decision support system for diabetes linked to electronic medical records. *Journal of the American Medical Informatics Association : JAMIA*. 2012;19(3):341-345.
  46. Holbrook A, Thabane L, Keshavjee K, et al. Individualized electronic decision support and reminders to improve diabetes care in the community: COMPETE II randomized trial. *CMAJ : Canadian Medical Association journal = journal de l'Association medicale canadienne*. 2009;181(1-2):37-44.
  47. Gilmer TP, O'Connor PJ, Sperl-Hillen JM, et al. Cost-effectiveness of an electronic medical record based clinical decision support system. *Health services research*. 2012;47(6):2137-2158.
  48. O'Connor PJ, Sperl-Hillen JM, Rush WA, et al. Impact of electronic health record clinical decision support on diabetes care: a randomized trial. *Annals of family medicine*. 2011;9(1):12-21.

## SUPPLEMENTARY DATA

49. Mason JM, Young RJ, New JP, et al. Economic analysis of a telemedicine intervention to improve glycemic control in patients with diabetes mellitus: illustration of a novel analytic method. *Disease Management and Health Outcomes*. 2006;14(6):377-385.
50. Young RJ, Taylor J, Friede T, et al. Pro-active call center treatment support (PACCTS) to improve glucose control in type 2 diabetes: a randomized controlled trial. *Diabetes care*. 2005;28(2):278-282.
51. Dijkstra RF, Niessen LW, Braspenning JC, Adang E, Grol RT. Patient-centred and professional-directed implementation strategies for diabetes guidelines: a cluster-randomized trial-based cost-effectiveness analysis. *Diabetic medicine : a journal of the British Diabetic Association*. 2006;23(2):164-170.
52. Dijkstra RF, Braspenning JC, Huijsmans Z, et al. Introduction of diabetes passports involving both patients and professionals to improve hospital outpatient diabetes care. *Diabetes research and clinical practice*. 2005;68(2):126-134.
53. Slingerland AS, Herman WH, Redekop WK, Dijkstra RF, Jukema JW, Niessen LW. Stratified patient-centered care in type 2 diabetes: a cluster-randomized, controlled clinical trial of effectiveness and cost-effectiveness. *Diabetes care*. 2013;36(10):3054-3061.
54. Prezio EA, Pagan JA, Shuval K, Culica D. The Community Diabetes Education (CoDE) program: cost-effectiveness and health outcomes. *American journal of preventive medicine*. 2014;47(6):771-779.
55. Prezio EA, Cheng D, Balasubramanian BA, Shuval K, Kendzor DE, Culica D. Community Diabetes Education (CoDE) for uninsured Mexican Americans: a randomized controlled trial of a culturally tailored diabetes education and management program led by a community health worker. *Diabetes research and clinical practice*. 2013;100(1):19-28.
56. Schouten LM, Niessen LW, van de Pas JW, Grol RP, Hulscher ME. Cost-effectiveness of a quality improvement collaborative focusing on patients with diabetes. *Medical care*. 2010;48(10):884-891.
57. Gilmer TP, Roze S, Valentine WJ, et al. Cost-effectiveness of diabetes case management for low-income populations. *Health services research*. 2007;42(5):1943-1959.
58. Kuo S, Bryce CL, Zgibor JC, Wolf DL, Roberts MS, Smith KJ. Cost-effectiveness of implementing the chronic care model for diabetes care in a military population. *Journal of diabetes science and technology*. 2011;5(3):501-513.
59. McRae IS, Butler JR, Sibthorpe BM, et al. A cost effectiveness study of integrated care in health services delivery: a diabetes program in Australia. *BMC health services research*. 2008;8:205.
60. Giorda CB, Nicolucci A, Pellegrini F, et al. Improving quality of care in people with Type 2 diabetes through the Associazione Medici Diabetologi-annals initiative: a long-term cost-effectiveness analysis. *Diabetic medicine : a journal of the British Diabetic Association*. 2013.
61. Nicolucci A, Rossi MC, Arcangeli A, et al. Four-year impact of a continuous quality improvement effort implemented by a network of diabetes outpatient clinics: the AMD-Annals initiative. *Diabetic medicine : a journal of the British Diabetic Association*. 2010;27(9):1041-1048.
62. Chin MH, Cook S, Drum ML, et al. Improving diabetes care in midwest community health centers with the health disparities collaborative. *Diabetes care*. 2004;27(1):2-8.
63. Huang ES, Zhang Q, Brown SE, Drum ML, Meltzer DO, Chin MH. The cost-effectiveness of improving diabetes care in U.S. federally qualified community health centers. *Health services research*. 2007;42(6 Pt 1):2174-2193; discussion 2294-2323.
64. Huang ES, Brown SE, Zhang JX, et al. The cost consequences of improving diabetes care: the community health center experience. *Joint Commission journal on quality and patient safety / Joint Commission Resources*. 2008;34(3):138-146.

## SUPPLEMENTARY DATA

65. Brownson CA, Hoerger TJ, Fisher EB, Kilpatrick KE. Cost-effectiveness of diabetes self-management programs in community primary care settings. *Diabetes Educator*. 2009;35(5):761-769.
66. O'Reilly D, Hopkins R, Blackhouse G, et al. Long-term cost-utility analysis of a multidisciplinary primary care diabetes management program in Ontario. *Canadian journal of diabetes*. 2007;31(3):205-214.
67. Lee H, Dolovich L, Ciliska D, et al. *The Evaluation of the Continuity of Care at the Group Health Centre, a Unique Multi-specialty, Multi-disciplinary Health Service Organization*. Ottawa, ON, Canada: Canadian Health Services Research Foundation;2006.
68. Gozzoli V, Palmer AJ, Brandt A, Spinaz GA. Economic and clinical impact of alternative disease management strategies for secondary prevention in type 2 diabetes in the Swiss setting. *Swiss medical weekly*. 2001;131(21-22):303-310.
69. Brown HS, 3rd, Wilson KJ, Pagan JA, et al. Cost-effectiveness analysis of a community health worker intervention for low-income Hispanic adults with diabetes. *Preventing chronic disease*. 2012;9:E140.
70. Wagner EH. Chronic disease management: what will it take to improve care for chronic illness? *Effective clinical practice : ECP*. 1998;1(1):2-4.
71. Eastman RC, Javitt JC, Herman WH, et al. Model of complications of NIDDM. II. Analysis of the health benefits and cost-effectiveness of treating NIDDM with the goal of normoglycemia. *Diabetes care*. 1997;20(5):735-744.
